# Supplementary material for: Ruthenium-catalyzed hydrophosphinylative cyclization of 1,6-diynes. Stereoselective synthesis of exocyclic 1,3-dienylphosphine oxides
Source: Royal Society of Chemistry journal article supplement (doi:10.1039/c2cc34044e), 2012-01-01

# **Ruthenium-catalyzed hydrophosphinylation of 1,6-diynes. Stereoselective synthesis of exocyclic 1,3-dienylphosphine oxides**

Yoshihiko Yamamoto,\* Kosuke Fukatsu, and Hisao Nishiyama

Department of Basic Medicinal Sciences, Graduate School of Pharmaceutical Sciences, and  
Department of Applied Chemistry, Graduate School of Engineering, Nagoya University, Chikusa,  
Nagoya 464-8601, Japan

yamamoto-yoshi@ps.nagoya-u.ac.jp

## **Supporting Information**

|                                                                        |     |
|------------------------------------------------------------------------|-----|
| 1. General Considerations                                              | S2  |
| 2. Ruthenium-Catalyzed Reaction of Diynes with Diphenylphosphine Oxide | S2  |
| 3. Crystallographic Structural Determinations                          | S5  |
| 4. Theoretical Calculations                                            | S7  |
| 5. NMR Charts                                                          | S28 |

## 1. General Considerations

Column chromatography was performed on silica gel (Cica silica gel 60N) with solvents specified below.  $^1\text{H}$ ,  $^{13}\text{C}$ , and  $^{31}\text{P}$  NMR spectra were obtained for samples in  $\text{CDCl}_3$  solutions at 25 °C.  $^1\text{H}$  NMR chemical shifts are reported in terms of chemical shift ( $\delta$ , ppm) relative to the singlet at 7.26 ppm for chloroform. Splitting patterns are designated as follows: s, singlet; d, doublet; t, triplet; q, quartet; quint, quintet; sext, sextet; sept, septet; m, multiplet. Coupling constants are reported in Hz.  $^{13}\text{C}$  NMR spectra were fully decoupled and are reported in terms of chemical shift ( $\delta$ , ppm) relative to the triplet at  $\delta = 77.0$  ppm for  $\text{CDCl}_3$ . Chemical shifts for  $^{31}\text{P}$  NMR are reported relative to external  $\text{H}_3\text{PO}_4$  standard. Mass measurements and elemental analyses were performed in the Instrumental Analysis Facility of Nagoya University. Melting points were obtained in capillary tubes. Dry solvents were purchased and used directly as received.  $\text{Cp}^*\text{RuCl}(\text{cod})$  (**1a**),<sup>1</sup>  $[\text{Cp}^*\text{Ru}(\text{CH}_3\text{CN})_3]\text{PF}_6$  (**1b**),<sup>2</sup> and  $[\text{CpRu}(\text{CH}_3\text{CN})_3]\text{PF}_6$  (**1c**)<sup>3</sup> were prepared according to the reports. Diynes **2a**,<sup>4</sup> **2b**,<sup>5</sup> **2c**,<sup>6</sup> **2d**,<sup>7</sup> **2e**,<sup>8</sup> **2f**,<sup>9</sup> **2g**,<sup>10</sup> **2h**,<sup>9</sup> **2i**,<sup>7</sup> **2j**,<sup>11</sup> **2k**,<sup>11</sup> and **2l**<sup>11</sup> were known compounds.

## 2. Ruthenium-Catalyzed Reaction of Diynes with Diphenylphosphine Oxide.

**General procedures – Cyclization of 2a:** To a mixture of diyne **2a** (73.9 mg, 0.30 mmol),  $\text{Cp}^*\text{Ru}(\text{AN})_3\text{PF}_6$  (**1b**) (7.6 mg, 0.015 mmol), MS 4Å (10 mg) was added a 0.25 M  $\text{CHCl}_3$  solution of  $\text{Ph}_2\text{P}(\text{O})\text{H}$  (1.2 mL, 0.3 mmol) at room temperature under an argon atmosphere. The resultant reaction mixture was stirred at 70 °C for 2 h. The reaction progress was traced by TLC analysis. After cooled to room temperature, the reaction mixture was concentrated *in vacuo*, and the crude material was purified with silica gel column chromatography (hexane:AcOEt = 1:1.5) to give **3a** (106.6 mg, 79% yield) as colorless solid (mp 147.0–148.0 °C): IR (KBr): 1173 (P=O)  $\text{cm}^{-1}$ ;  $^1\text{H}$  NMR (300 MHz,  $\text{CDCl}_3$ , 25 °C):  $\delta$  4.28 (d,  $J = 3.6$  Hz, 2 H), 4.69 (d,  $J = 2.1$  Hz, 2 H), 6.93–6.97 (m, 4 H), 7.03–7.11 (m, 3 H), 7.21–7.38 (m, 9 H), 7.60–7.68 (m, 4 H), 8.07 (t,  $J = 2.1$  Hz, 1 H);  $^{13}\text{C}$  NMR (75 MHz,  $\text{CDCl}_3$ , 25 °C):  $\delta$  72.1, 73.0 ( $J = 12.0$  Hz), 126.7 ( $J = 1.7$  Hz), 126.9 ( $J = 94.7$  Hz), 127.5, 127.7, 127.8, 127.9 (d,  $J = 6.8$  Hz), 128.1 (d,  $J = 1.1$  Hz), 128.5 (d,  $J = 4.0$  Hz), 128.9, 131.0

<sup>1</sup> (a) N. Oshima, H. Suzuki and Y. Moro-oka, *Chem. Lett.*, **1984**, 1161. (b) Y. Yamamoto and K. Hattori, *Tetrahedron*, **2008**, *64*, 847.

<sup>2</sup> B. Steinmetz and W. A. Schenk, *Organometallics*, **1999**, *18*, 943.

<sup>3</sup> E. P. Kündig and F. R. Monnier, *Adv. Synth. Catal.*, **2004**, *346*, 901.

<sup>4</sup> A. Scheller, W. Winter and E. Müller, *Liebigs Ann. Chem.*, **1976**, 1448.

<sup>5</sup> I. G. Jung, J. Seo, S. I. Lee, S. Y. Choi and Y. K. Chung, *Organometallics*, **2006**, *25*, 4240.

<sup>6</sup> H.-Y. Jang and M. J. Krische, *J. Am. Chem. Soc.*, **2004**, *126*, 7875.

<sup>7</sup> Y. Hu, Y. Sun, J. Hu, T. Zhu, T. Yu and Q. Zhao, *Chem. Asian J.*, **2011**, *6*, 797.

<sup>8</sup> K. E. Schulte, J. Reisc and K. Mock, *Arch. Pharm.*, **1962**, *295*, 627.

<sup>9</sup> K. Yamashita, Y. Nagashima, Y. Yamamoto and H. Nishiyama, *Chem. Commun.*, **2011**, *47*, 11552.

<sup>10</sup> B. L. Lucht, S. S. H. Mao and T. D. Tilley, *J. Am. Chem. Soc.*, **1998**, *120*, 4354.

<sup>11</sup> K. Yamashita, Y. Yamamoto and H. Nishiyama, *J. Am. Chem. Soc.*, **2012**, *134*, 11516.

(d,  $J = 2.3$  Hz), 131.4 (d,  $J = 9.2$  Hz), 132.8, 133.6 (d,  $J = 4.6$  Hz), 133.8 (d,  $J = 1.7$  Hz), 136.2, 138.8 (d,  $J = 9.8$  Hz), 152.4 (d,  $J = 5.7$  Hz);  $^{31}\text{P}$  NMR (121 MHz,  $\text{CDCl}_3$ , 25 °C):  $\delta$  27.2; HRMS (FAB)  $m/z$  calcd for  $\text{C}_{30}\text{H}_{25}\text{O}_2\text{P}\cdot\text{H}$  449.1670, found 449.1670  $[\text{M}+\text{H}]^+$ .

**Analytical data for 3b:** colorless solid (mp 178.0–178.5 °C); IR (KBr): 1166 (P=O)  $\text{cm}^{-1}$ ;  $^1\text{H}$  NMR (300 MHz,  $\text{CDCl}_3$ , 25 °C):  $\delta$  2.46 (s, 3 H), 3.79 (d,  $J = 3.6$  Hz, 2 H), 4.12 (d,  $J = 1.8$  Hz, 2 H), 6.82–6.86 (m, 4 H), 7.08–7.11 (m, 3 H), 7.18–7.36 (m, 11 H), 7.45–7.54 (m, 6 H), 7.81 (t,  $J = 1.8$  Hz, 1 H);  $^{13}\text{C}$  NMR (75 MHz,  $\text{CDCl}_3$ , 25 °C):  $\delta$  22.2, 52.2, 53.2 (d,  $J = 11.4$  Hz), 127.5 (d,  $J = 2.3$  Hz), 127.7, 128.2 (d,  $J = 4.6$  Hz), 128.4, 128.6, 128.7 (d,  $J = 1.7$  Hz), 128.9 (d,  $J = 4.0$  Hz), 129.3, 130.0, 130.4, 130.8 (d,  $J = 5.1$  Hz), 131.5 (d,  $J = 2.9$  Hz), 131.6, 131.7 (d,  $J = 9.2$  Hz), 133.1 (d,  $J = 18.2$  Hz), 135.6 (d,  $J = 1.8$  Hz), 135.7, 138.6 (d,  $J = 9.2$  Hz), 144.0, 152.2 (d,  $J = 7.4$  Hz);  $^{31}\text{P}$  NMR (121 MHz,  $\text{CDCl}_3$ , 25 °C):  $\delta$  27.2; HRMS (FAB)  $m/z$  calcd for  $\text{C}_{37}\text{H}_{32}\text{NO}_3\text{PS}\cdot\text{H}$  602.1919, found 602.1916  $[\text{M}+\text{H}]^+$ .

**Analytical data for 3c:** colorless solid (mp 195.5–196.0 °C); IR (KBr): 1732 (C=O), 1173 (P=O)  $\text{cm}^{-1}$ ;  $^1\text{H}$  NMR (300 MHz,  $\text{CDCl}_3$ , 25 °C):  $\delta$  2.88 (d,  $J = 3.3$  Hz, 2 H), 3.11 (d,  $J = 2.4$  Hz, 2 H), 3.68 (s, 6 H), 6.94–6.98 (m, 2 H), 7.02–7.12 (m, 5 H), 7.16–7.31 (m, 9 H), 7.56–7.64 (m, 4 H), 7.91 (t,  $J = 2.1$  Hz, 1 H);  $^{13}\text{C}$  NMR (75 MHz,  $\text{CDCl}_3$ , 25 °C):  $\delta$  38.9, 41.5 (d,  $J = 11.4$  Hz), 53.4, 57.0, 126.8 (d,  $J = 1.7$  Hz), 127.8 (d,  $J = 12.0$  Hz), 128.1 (d,  $J = 2.3$  Hz), 128.4 (d,  $J = 1.7$  Hz), 129.4, 129.5, 129.8, 131.0 (d,  $J = 2.3$  Hz), 131.7 (d,  $J = 9.1$  Hz), 132.5, 133.8, 134.9 (d,  $J = 1.7$  Hz), 135.0 (d,  $J = 5.7$  Hz), 136.7, 139.6 (d,  $J = 9.7$  Hz), 156.9 (d,  $J = 7.4$  Hz), 171.6;  $^{31}\text{P}$  NMR (121 MHz,  $\text{CDCl}_3$ , 25 °C):  $\delta$  26.9; HRMS (FAB)  $m/z$  calcd for  $\text{C}_{35}\text{H}_{31}\text{O}_5\text{P}\cdot\text{H}$  563.1987, found 563.1979  $[\text{M}+\text{H}]^+$ .

**Analytical data for 3d:** colorless solid (mp 163.0–164.0 °C); IR (KBr): 1730 (C=O), 1189 (P=O)  $\text{cm}^{-1}$ ;  $^1\text{H}$  NMR (300 MHz,  $\text{CDCl}_3$ , 25 °C):  $\delta$  1.17 (t,  $J = 7.2$  Hz, 6 H), 2.87 (d,  $J = 3.3$  Hz, 2 H), 3.09 (d,  $J = 2.1$  Hz, 2 H), 4.14 (q,  $J = 7.2$  Hz, 4 H), 6.94–6.98 (m, 2 H), 7.02–7.10 (m, 5 H), 7.16–7.31 (m, 9 H), 7.56–7.64 (m, 4 H), 7.88 (t,  $J = 2.1$  Hz, 1 H);  $^{13}\text{C}$  NMR (75 MHz,  $\text{CDCl}_3$ , 25 °C):  $\delta$  14.1, 38.3, 40.9 (d,  $J = 10.9$  Hz), 56.6, 61.8, 126.3 (d,  $J = 1.7$  Hz), 127.3, 127.5, 127.6, 127.9 (d,  $J = 1.1$  Hz), 129.0, 129.1 (d,  $J = 4.0$  Hz), 129.8 (d,  $J = 95.3$  Hz), 130.6 (d,  $J = 2.9$  Hz), 131.2 (d,  $J = 9.2$  Hz), 132.7 (d,  $J = 103.8$  Hz), 134.2 (d,  $J = 1.7$  Hz), 134.9 (d,  $J = 5.7$  Hz), 136.2, 139.1 (d,  $J = 9.8$  Hz), 156.8 (d,  $J = 7.4$  Hz), 170.7;  $^{31}\text{P}$  NMR (121 MHz,  $\text{CDCl}_3$ , 25 °C):  $\delta$  26.9; HRMS (FAB)  $m/z$  calcd for  $\text{C}_{37}\text{H}_{35}\text{O}_5\text{P}\cdot\text{H}$  591.2300, found 591.2310  $[\text{M}+\text{H}]^+$ .

**Analytical data for 3e:** colorless solid (mp 107.0–198.5 °C); IR (KBr): 1695 (C=O), 1172 (P=O)  $\text{cm}^{-1}$ ;  $^1\text{H}$  NMR (300 MHz,  $\text{CDCl}_3$ , 25 °C):  $\delta$  2.00 (s, 6 H), 2.79 (d,  $J = 3.0$  Hz, 2 H),

2.97 (d,  $J = 2.1$  Hz, 2 H), 6.94–6.98 (m, 2 H), 7.01–7.15 (m, 5 H), 7.17–7.34 (m, 9 H), 7.52–7.60 (m, 4 H), 7.87 (t,  $J = 2.1$  Hz, 1 H);  $^{13}\text{C}$  NMR (75 MHz,  $\text{CDCl}_3$ , 25 °C):  $\delta$  26.6, 35.4, 38.2 (d,  $J = 10.9$  Hz), 70.8, 126.5 (d,  $J = 1.7$  Hz), 127.5, 127.7 (d,  $J = 5.1$  Hz), 128.1 (d,  $J = 1.1$  Hz), 128.2 (d,  $J = 111.8$  Hz), 129.0, 130.1, 130.7 (d,  $J = 2.9$  Hz), 131.2 (d,  $J = 9.1$  Hz), 131.9, 133.3, 134.4 (d,  $J = 1.7$  Hz), 134.9 (d,  $J = 5.7$  Hz), 136.1, 139.1 (d,  $J = 9.7$  Hz), 156.3 (d,  $J = 7.4$  Hz), 203.7;  $^{31}\text{P}$  NMR (121 MHz,  $\text{CDCl}_3$ , 25 °C):  $\delta$  26.9; HRMS (FAB)  $m/z$  calcd for  $\text{C}_{35}\text{H}_{31}\text{O}_3\text{P}\cdot\text{H}$  531.2089, found 531.2086  $[\text{M}+\text{H}]^+$ .

**Analytical data for 3f:** colorless solid (mp 254.0–255.0 °C); IR (KBr): 2255 ( $\text{C}\equiv\text{N}$ ), 1173 ( $\text{P}=\text{O}$ )  $\text{cm}^{-1}$ ;  $^1\text{H}$  NMR (300 MHz,  $\text{CDCl}_3$ , 25 °C):  $\delta$  3.02 (d,  $J = 3.0$  Hz, 2 H), 3.25 (d,  $J = 1.8$  Hz, 2 H), 6.90–7.03 (m, 4 H), 7.09–7.20 (m, 3 H), 7.22–7.38 (m, 9 H), 7.59–7.68 (m, 4 H), 8.19 (t,  $J = 1.8$  Hz, 1 H);  $^{13}\text{C}$  NMR (75 MHz,  $\text{CDCl}_3$ , 25 °C):  $\delta$  31.1, 42.3, 44.5 (d,  $J = 11.5$  Hz), 115.4, 127.2 (d,  $J = 1.7$  Hz), 127.9, 128.0, 128.2, 128.5 (d,  $J = 4.1$  Hz), 128.9, 129.3 (d,  $J = 5.1$  Hz), 131.0, 131.2, 131.4, 132.4, 135.2, 135.3, 137.9 (d,  $J = 1.7$  Hz), 138.3 (d,  $J = 9.1$  Hz), 150.2 (d,  $J = 8.0$  Hz);  $^{31}\text{P}$  NMR (121 MHz,  $\text{CDCl}_3$ , 25 °C):  $\delta$  27.1; HRMS (FAB)  $m/z$  calcd for  $\text{C}_{33}\text{H}_{25}\text{N}_2\text{OP}\cdot\text{H}$  497.1783, found 497.1773  $[\text{M}+\text{H}]^+$ .

**Analytical data for 3g:** colorless solid (mp 196.0–197.0 °C); IR (KBr): 1171 ( $\text{P}=\text{O}$ )  $\text{cm}^{-1}$ ;  $^1\text{H}$  NMR (300 MHz,  $\text{CDCl}_3$ , 25 °C):  $\delta$  1.60–1.70 (m, 3 H), 2.32 (dt,  $J = 7.5, 3.9$  Hz, 2 H), 2.38 (dt,  $J = 7.5, 1.8$  Hz, 2 H), 6.97–7.08 (m, 6 H), 7.15–7.30 (m, 10 H), 7.56–7.64 (m, 4 H), 7.85 (t,  $J = 2.0$  Hz, 1 H);  $^{13}\text{C}$  NMR (75 MHz,  $\text{CDCl}_3$ , 25 °C):  $\delta$  22.8, 31.9, 34.0 (d,  $J = 10.3$  Hz), 126.0 (d,  $J = 1.7$  Hz), 126.8, 127.4 (d,  $J = 2.9$  Hz), 127.5, 127.8 (d,  $J = 1.1$  Hz), 128.0 (d,  $J = 96.4$  Hz), 129.0, 129.1 (d,  $J = 4.0$  Hz), 130.3 (d,  $J = 2.9$  Hz), 131.1 (d,  $J = 9.2$  Hz), 132.6 (d,  $J = 11.9$  Hz), 133.3 (d,  $J = 91.3$  Hz), 136.9, 139.7 (d,  $J = 5.1$  Hz), 140.0 (d,  $J = 10.3$  Hz), 161.6 (d,  $J = 6.3$  Hz);  $^{31}\text{P}$  NMR (121 MHz,  $\text{CDCl}_3$ , 25 °C):  $\delta$  43.6; HRMS (FAB)  $m/z$  calcd for  $\text{C}_{31}\text{H}_{27}\text{OP}\cdot\text{H}$  447.1878, found 447.1877  $[\text{M}+\text{H}]^+$ .

**Analytical data for 3h:** colorless solid (mp 83.0–84.0 °C); IR (KBr): 1734 ( $\text{C}=\text{O}$ ), 1174 ( $\text{P}=\text{O}$ )  $\text{cm}^{-1}$ ;  $^1\text{H}$  NMR (300 MHz,  $\text{CDCl}_3$ , 25 °C):  $\delta$  2.86 (d,  $J = 3.3$  Hz, 2 H), 3.09 (d,  $J = 1.8$  Hz, 2 H), 3.69 (s, 6 H), 3.71 (s, 3 H), 3.80 (s, 3 H), 6.63 (d,  $J = 8.7$  Hz, 2 H), 6.75 (d,  $J = 8.7$  Hz, 2 H), 6.91–6.96 (m, 4 H), 7.17–7.36 (m, 4 H), 7.55–7.63 (m, 4 H), 7.81 (t,  $J = 1.8$  Hz, 1 H);  $^{13}\text{C}$  NMR (75 MHz,  $\text{CDCl}_3$ , 25 °C):  $\delta$  38.6, 41.2 (d,  $J = 11.4$  Hz), 53.0, 55.2 (d,  $J = 1.7$  Hz), 56.7, 113.2, 113.4, 127.6 (d,  $J = 12.0$  Hz), 128.6 (d,  $J = 95.9$  Hz), 129.2, 130.4 (d,  $J = 3.5$  Hz), 130.6 (d,  $J = 2.9$  Hz), 130.7, 131.3 (d,  $J = 9.2$  Hz), 131.7 (d,  $J = 9.8$  Hz), 132.4, 132.6 (d,  $J = 5.7$  Hz), 133.7, 140.0 (d,  $J = 1.7$  Hz), 157.3 (d,  $J = 8.6$  Hz), 157.8 (d,  $J = 1.7$  Hz), 158.8, 171.3;  $^{31}\text{P}$  NMR (121 MHz,  $\text{CDCl}_3$ , 25 °C):  $\delta$  27.3; HRMS (FAB)  $m/z$  calcd for  $\text{C}_{37}\text{H}_{35}\text{O}_7\text{P}\cdot\text{H}$  623.2199, found 623.2211  $[\text{M}+\text{H}]^+$ .

**Analytical data for 3i:** colorless solid (mp 166.0–167.0 °C); IR (KBr): 1731 (C=O), 1177 (P=O)  $\text{cm}^{-1}$ ;  $^1\text{H}$  NMR (300 MHz,  $\text{CDCl}_3$ , 25 °C):  $\delta$  2.84 (d,  $J = 3.3$  Hz, 2 H), 3.06 (d,  $J = 2.4$  Hz, 2 H), 3.70 (s, 6 H), 6.80 (t,  $J = 8.7$  Hz, 2 H), 6.91 (d,  $J = 8.1$  Hz, 2 H), 6.92 (d,  $J = 6.3$  Hz, 2 H), 7.00 (ddd,  $J = 9.0, 5.1, 1.5$  Hz, 2 H), 7.17–7.36 (m, 8 H), 7.54–7.62 (m, 4 H), 7.85 (t,  $J = 2.4$  Hz, 1 H);  $^{13}\text{C}$  NMR (75 MHz,  $\text{CDCl}_3$ , 25 °C):  $\delta$  38.4, 41.0 (d,  $J = 11.4$  Hz), 53.1, 56.5, 114.9 (d,  $J = 21.7$  Hz), 115.0 (dd,  $J = 21.2, 1.2$  Hz), 127.7 (d,  $J = 12.0$  Hz), 129.2 (d,  $J = 95.9$  Hz), 130.72, 130.74 (d,  $J = 11.4$  Hz), 130.8, 131.2 (d,  $J = 9.1$  Hz), 131.8, 132.2 (d,  $J = 3.5$  Hz), 133.3 (d,  $J = 15.4$  Hz), 134.2 (dd,  $J = 5.1, 1.5$  Hz), 135.0 (dd,  $J = 8.1, 3.5$  Hz), 157.0 (d,  $J = 7.4$  Hz), 161.1 (dd,  $J = 244.7, 2.0$  Hz), 161.8 (d,  $J = 245.8$  Hz), 171.1;  $^{31}\text{P}$  NMR (121 MHz,  $\text{CDCl}_3$ , 25 °C):  $\delta$  26.9 ( $J_{\text{F-P}} = 3.4$  Hz); HRMS (FAB)  $m/z$  calcd for  $\text{C}_{35}\text{H}_{29}\text{F}_2\text{O}_5\text{P}\cdot\text{H}$  599.1799, found 599.1814  $[\text{M}+\text{H}]^+$ .

**Analytical data for 3j:** yellow solid (mp 167.0–168.0 °C); IR (KBr): 1727 (C=O), 1171 (P=O)  $\text{cm}^{-1}$ ;  $^1\text{H}$  NMR (300 MHz,  $\text{CDCl}_3$ , 25 °C):  $\delta$  3.07 (d,  $J = 3.0$  Hz, 2 H), 3.18 (d,  $J = 2.4$  Hz, 2 H), 3.75 (s, 6 H), 6.59 (ddd,  $J = 3.6, 2.1, 1.2$  Hz, 1 H), 6.72 (dd,  $J = 5.4, 3.6$  Hz, 1 H), 6.99 (dd,  $J = 5.1, 3.6$  Hz, 1 H), 7.02 (d,  $J = 2.7$  Hz, 1 H), 7.07 (dt,  $J = 5.4, 1.2$  Hz, 1 H), 7.20–7.35 (m, 7 H), 7.60–7.68 (m, 4 H), 8.27 (t,  $J = 2.4$  Hz, 1 H);  $^{13}\text{C}$  NMR (75 MHz,  $\text{CDCl}_3$ , 25 °C):  $\delta$  39.4, 43.2 (d,  $J = 10.3$  Hz), 53.5, 57.1, 121.6, 122.9, 126.5 (d,  $J = 2.3$  Hz), 127.0 (d,  $J = 1.7$  Hz), 127.5, 128.0 (d,  $J = 11.9$  Hz), 128.2 (d,  $J = 6.3$  Hz), 128.5 (d,  $J = 2.3$  Hz), 130.7, 131.3 (d,  $J = 2.9$  Hz), 131.7 (d,  $J = 9.2$  Hz), 131.8 (d,  $J = 29.7$  Hz), 133.4, 140.1, 140.6 (d,  $J = 10.8$  Hz), 160.8 (d,  $J = 8.6$  Hz), 171.7;  $^{31}\text{P}$  NMR (121 MHz,  $\text{CDCl}_3$ , 25 °C):  $\delta$  27.4; HRMS (FAB)  $m/z$  calcd for  $\text{C}_{31}\text{H}_{27}\text{O}_5\text{PS}_2\cdot\text{H}$  575.1116, found 575.1108  $[\text{M}+\text{H}]^+$ .

**3. Crystallographic Structural Determinations:** A single crystal suitable for X-ray analysis was mounted on a glass fiber, and diffraction data were collected at 153 K on a Bruker SMART APEX CCD diffractometer with graphite monochromated Mo- $\text{K}\alpha$  radiation ( $\lambda = 0.71073$  Å). The absorption correction was made using SADABS. The structure was solved by direct methods and refined by the full-matrix least-squares on  $F^2$  by using SHELXTL.<sup>12</sup> All non-hydrogen atoms were refined with anisotropic displacement parameters. All hydrogen atoms were placed in calculated positions. CCDC 879594 (**3d**) contains the supplementary crystallographic data for this paper. These data can be obtained free of charge via [www.ccdc.cam.ac.uk/conts/retrieving.html](http://www.ccdc.cam.ac.uk/conts/retrieving.html) (or from the Cambridge Crystallographic Data Centre, 12, Union Road, Cambridge CB2 1EZ, UK; fax: +44 1223 336033; or [deposit@ccdc.cam.ac.uk](mailto:deposit@ccdc.cam.ac.uk)).

<sup>12</sup> G. M. Sheldrick, SHELXTL 5.1, Bruker AXS Inc., Madison, Wisconsin, 1997.

**Table S1.** Selected crystallographic data and collection parameters for **3d**.

| <b>3d</b>                                                       |                                                  |
|-----------------------------------------------------------------|--------------------------------------------------|
| Formula                                                         | C <sub>37</sub> H <sub>35</sub> O <sub>3</sub> P |
| Fw                                                              | 590.62                                           |
| Crystal system                                                  | Triclinic                                        |
| Space group                                                     | P-1 (#2)                                         |
| <i>a</i> [Å]                                                    | 11.0389(9)                                       |
| <i>b</i> [Å]                                                    | 11.7426(10)                                      |
| <i>c</i> [Å]                                                    | 13.2377(11)                                      |
| α [°]                                                           | 68.091(2)                                        |
| β [°]                                                           | 77.2830(10)                                      |
| γ [°]                                                           | 80.2790(10)                                      |
| V [Å <sup>3</sup> ]                                             | 1545.8(2)                                        |
| Z                                                               | 2                                                |
| <i>D</i> <sub>calc</sub> [g cm <sup>-3</sup> ]                  | 1.269                                            |
| μ [mm <sup>-1</sup> ]                                           | 0.132                                            |
| <i>F</i> (000)                                                  | 624                                              |
| Crystal size [mm <sup>3</sup> ]                                 | 0.70 × 0.20 × 0.10                               |
| Reflections collected                                           | 11532                                            |
| Independent reflections                                         | 7520 ( <i>R</i> <sub>int</sub> = 0.0179)         |
| GOF on <i>F</i> <sup>2</sup>                                    | 1.029                                            |
| <i>R</i> <sub>1</sub> [ <i>I</i> > 2σ( <i>I</i> )] <sup>a</sup> | 0.0443                                           |
| <i>wR</i> <sub>2</sub> (all data) <sup>b</sup>                  | 0.1309                                           |
| Largest diff. peak / hole [e Å <sup>-3</sup> ]                  | 0.583 / -0.333                                   |

<sup>a</sup>  $R_1 = \Sigma(|F_o - F_c|) / \Sigma(F_o)$ . <sup>b</sup>  $wR_2 = \{\Sigma[(w(F_o^2 - F_c^2))^2] / \Sigma[w(F_o^2)^2]\}^{1/2}$ .

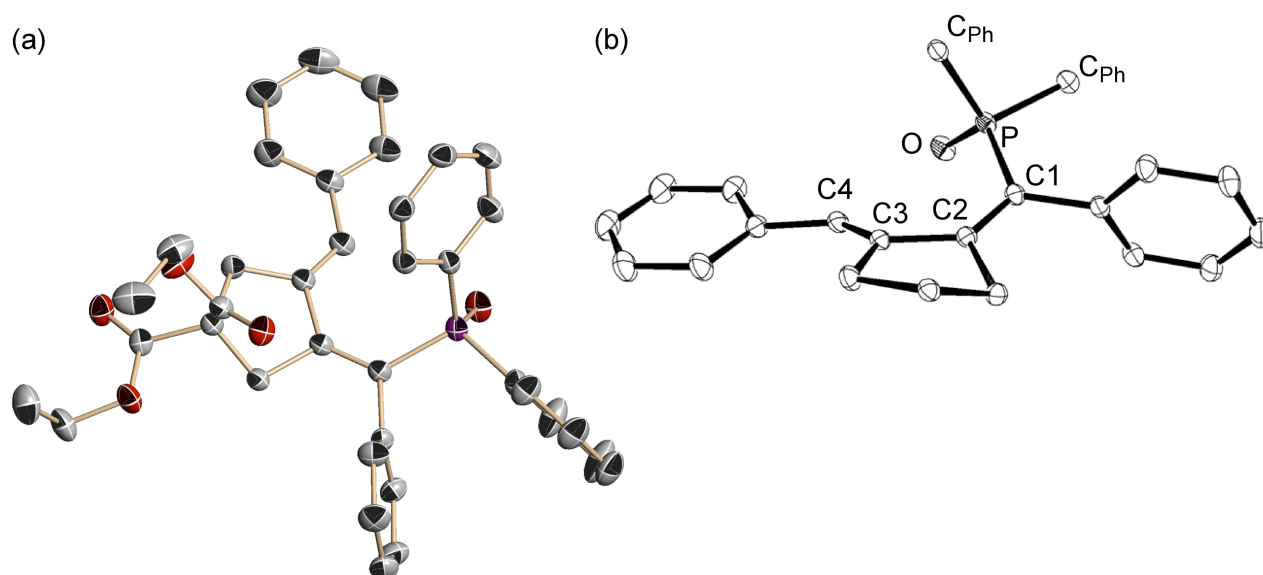

**Figure S1.** ORTEP diagrams for **3d**. Ellipsoids are shown at the 30% probability level. All hydrogen atoms are omitted for clarity. The phosphine phenyl rings and ester groups were also omitted in (b). C1–C2 = 1.3537(17) Å, C2–C3 = 1.4855(16) Å, C3–C4 = 1.3496(17) Å,  $\angle$ C1–C2–C3–C4 = 26.9° and  $\angle$ P–C1–C2–C3 = 6.1°.

#### 4. Theoretical Calculations.

The Gaussian 09 program package was used for all geometry optimizations.<sup>13</sup> The geometries of stationary points and transition states were fully optimized by means of the Becke's three-parameter hybrid density functional method (B3LYP)<sup>14</sup> with the basis set, consisting of a

<sup>13</sup> Gaussian 09, Revision C.01, M. J. Frisch, G. W. Trucks, H. B. Schlegel, G. E. Scuseria, M. A. Robb, J. R. Cheeseman, G. Scalmani, V. Barone, B. Mennucci, G. A. Petersson, H. Nakatsuji, M. Caricato, X. Li, H. P. Hratchian, A. F. Izmaylov, J. Bloino, G. Zheng, J. L. Sonnenberg, M. Hada, M. Ehara, K. Toyota, R. Fukuda, J. Hasegawa, M. Ishida, T. Nakajima, Y. Honda, O. Kitao, H. Nakai, T. Vreven, J. A. Montgomery, Jr., J. E. Peralta, F. Ogliaro, M. Bearpark, J. J. Heyd, E. Brothers, K. N. Kudin, V. N. Staroverov, R. Kobayashi, J. Normand, K. Raghavachari, A. Rendell, J. C. Burant, S. S. Iyengar, J. Tomasi, M. Cossi, N. Rega, J. M. Millam, M. Klene, J. E. Knox, J. B. Cross, V. Bakken, C. Adamo, J. Jaramillo, R. Gomperts, R. E. Stratmann, O. Yazyev, A. J. Austin, R. Cammi, C. Pomelli, J. W. Ochterski, R. L. Martin, K. Morokuma, V. G. Zakrzewski, G. A. Voth, P. Salvador, J. J. Dannenberg, S. Dapprich, A. D. Daniels, Ö. Farkas, J. B. Foresman, J. V. Ortiz, J. Cioslowski, and D. J. Fox, Gaussian, Inc., Wallingford CT, 2009.

<sup>14</sup> (a) W. Kohn, A. D. Becke and R. G. Parr, *J. Phys. Chem.*, **1996**, *100*, 12974. (b) P. J. Stephen, F. J. Devlin, C. F. Chabalowski and M. Frisch, *J. Phys. Chem.*, **1994**, *98*, 11623. (c) A. D. Becke, *J. Chem. Phys.*, **1993**, *98*, 11623. (d) C. Lee, W. Yang and R. G. Parr, *Phys. Rev. B*, **1988**, *37*, 785.

double- $\zeta$  basis set with the relativistic effective core potential of Hay and Wadt (LanL2DZ).<sup>15</sup> The vibrational frequencies, zero-point energy (ZPE) and thermal correction to Gibbs free energy (TCGFE) were calculated at the same level of theory. The obtained structures were characterized by the number of imaginary frequencies (one or zero for transition or ground states, respectively). The connectivity of each step was further confirmed by IRC calculation<sup>16</sup> from the transition states followed by optimization of the resulted geometries. Single-point energies for geometries obtained by the above method were calculated at the same level using the basis sets consisting of a [6s5p3d2f1g] contracted valence basis set with the Stuttgart-Dresden-Bonn energy-consistent pseudopotential (SDD)<sup>17,18</sup> for Ru and the 6-311++G(2d,p) basis sets<sup>19</sup> for other elements. The obtained results are summarized in Table S2.

**Table S2.** Summary of theoretical calculations.

| Model        | Energy/au      | ZPE/au   | TCGFE/au | IF/cm <sup>-1</sup> |
|--------------|----------------|----------|----------|---------------------|
| <b>A</b>     | -1785.96615999 | 0.507307 | 0.437099 |                     |
| <b>TS-AB</b> | -1785.94377874 | 0.507130 | 0.437735 | 208.3472i           |
| <b>B</b>     | -1786.02272489 | 0.511881 | 0.443419 |                     |
| <b>TS-BC</b> | -1785.98501114 | 0.508454 | 0.441371 | 1050.8670i          |
| <b>C</b>     | -1785.99923137 | 0.513211 | 0.444642 |                     |
| <b>TS-CD</b> | -1785.99149972 | 0.512885 | 0.447885 | 121.1288i           |
| <b>D</b>     | -1786.01165337 | 0.514077 | 0.449095 |                     |
| <b>TS-DE</b> | -1785.99408022 | 0.513039 | 0.447880 | 357.2437i           |
| <b>E</b>     | -1786.06263541 | 0.515819 | 0.449208 |                     |

<sup>15</sup> P. J. Hay and W. R. Wadt, *J. Chem. Phys.*, **1985**, 82, 299.

<sup>16</sup> (a) K. Fukui, *Acc. Chem. Res.*, **1981**, 14, 363. (b) C. Gonzalez and H. B. Schlegel, *J. Chem. Phys.*, **1989**, 90, 2154. (c) C. Gonzalez and H. B. Schlegel, *J. Phys. Chem.*, **1990**, 94, 5523.

<sup>17</sup> J. M. L. Martin and A. Sundermann, *J. Chem. Phys.*, **2001**, 114, 3408.

<sup>18</sup> D. Andrae, U. Häussermann, M. Dolg, H. Stoll and H. Preuß, *Theor. Chim. Acta*, **1990**, 77, 123.

<sup>19</sup> (a) R. Krishnan, J. S. Binkley, R. Seeger and J. A. Pople, *J. Chem. Phys.*, **1980**, 72, 650. (b) A. D. McLean and G. S. Chandler, *J. Chem. Phys.* **1980**, 72, 5639. (c) M. J. Frisch, J. A. Pople and J. S. Binkley, *J. Chem. Phys.*, **1984**, 80, 3265. (d) T. Clark, J. Chandrasekhar, G. W. Spitznagel and P. v. R. Schleyer, *J. Comp. Chem.*, **1983**, 4, 294.



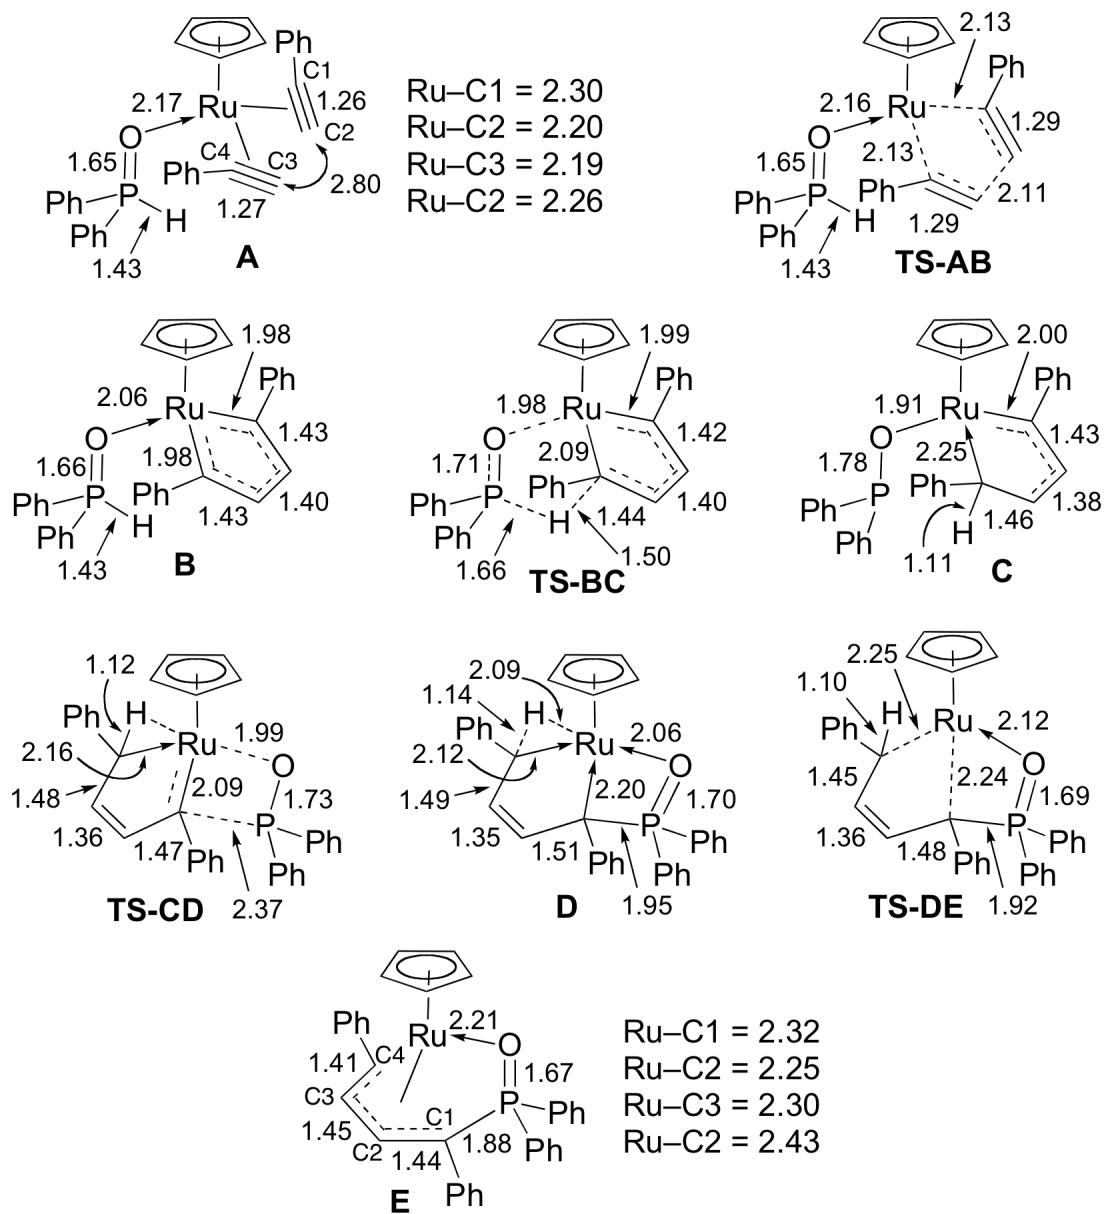

**Figure S2.** Interatomic distances (Å) of model complexes.

### Standard orientations for A

| Center Number | Atomic Number | Atomic Type | Coordinates (Angstroms) |           |           |
|---------------|---------------|-------------|-------------------------|-----------|-----------|
|               |               |             | X                       | Y         | Z         |
| 1             | 44            | 0           | 0.734106                | -1.773044 | 0.186604  |
| 2             | 6             | 0           | 0.744917                | -4.015234 | -0.150620 |
| 3             | 6             | 0           | 2.098352                | -3.576144 | 0.007447  |
| 4             | 6             | 0           | 2.418205                | -2.704613 | -1.113768 |
| 5             | 6             | 0           | 1.266351                | -2.639330 | -1.968262 |
| 6             | 6             | 0           | 0.220998                | -3.419791 | -1.372269 |
| 7             | 6             | 0           | -1.531540               | -1.842748 | 0.589233  |
| 8             | 6             | 0           | -0.885823               | -1.958182 | 1.669961  |
| 9             | 1             | 0           | -0.817666               | -2.039828 | 2.737424  |
| 10            | 6             | 0           | 1.744096                | -1.056003 | 1.992892  |
| 11            | 1             | 0           | 1.519712                | -1.223503 | 3.029525  |
| 12            | 6             | 0           | 2.424622                | -0.542321 | 1.052205  |
| 13            | 6             | 0           | -2.653025               | -1.799550 | -0.325031 |
| 14            | 6             | 0           | -3.863359               | -2.434250 | 0.063994  |
| 15            | 6             | 0           | -2.581907               | -1.152263 | -1.582215 |
| 16            | 6             | 0           | -4.976445               | -2.414442 | -0.791824 |
| 17            | 1             | 0           | -3.920210               | -2.938456 | 1.025221  |
| 18            | 6             | 0           | -3.700270               | -1.138241 | -2.431539 |
| 19            | 1             | 0           | -1.657676               | -0.657406 | -1.862279 |
| 20            | 6             | 0           | -4.899701               | -1.767978 | -2.041985 |
| 21            | 1             | 0           | -5.897894               | -2.904496 | -0.488702 |
| 22            | 1             | 0           | -3.640173               | -0.638156 | -3.394681 |
| 23            | 1             | 0           | -5.761870               | -1.757642 | -2.703420 |
| 24            | 6             | 0           | 3.482272                | 0.230418  | 0.430302  |
| 25            | 6             | 0           | 4.629424                | 0.557899  | 1.202427  |
| 26            | 6             | 0           | 3.404031                | 0.671720  | -0.913411 |
| 27            | 6             | 0           | 5.670253                | 1.309758  | 0.635135  |
| 28            | 1             | 0           | 4.698856                | 0.215690  | 2.231733  |
| 29            | 6             | 0           | 4.448706                | 1.426106  | -1.472117 |
| 30            | 1             | 0           | 2.523531                | 0.424356  | -1.499496 |
| 31            | 6             | 0           | 5.584610v1.746722       |           | -0.702522 |

|    |    |   |           |           |           |
|----|----|---|-----------|-----------|-----------|
| 32 | 1  | 0 | 6.546803  | 1.551330  | 1.230408  |
| 33 | 1  | 0 | 4.380655  | 1.761698  | -2.503515 |
| 34 | 1  | 0 | 6.393673  | 2.326415  | -1.138431 |
| 35 | 1  | 0 | 0.208814  | -4.682256 | 0.508924  |
| 36 | 1  | 0 | 2.770076  | -3.850665 | 0.807998  |
| 37 | 1  | 0 | 3.374301  | -2.236952 | -1.297917 |
| 38 | 1  | 0 | 1.188833  | -2.073609 | -2.886467 |
| 39 | 1  | 0 | -0.764754 | -3.581422 | -1.783696 |
| 40 | 1  | 0 | 1.214808  | 2.068866  | 0.858702  |
| 41 | 15 | 0 | -0.036466 | 1.638847  | 0.325742  |
| 42 | 8  | 0 | 0.116903  | 0.199384  | -0.467468 |
| 43 | 6  | 0 | -1.166923 | 1.711476  | 1.784342  |
| 44 | 6  | 0 | -2.560296 | 1.570076  | 1.612465  |
| 45 | 6  | 0 | -0.619596 | 1.905970  | 3.069705  |
| 46 | 6  | 0 | -3.405152 | 1.630470  | 2.733363  |
| 47 | 1  | 0 | -2.985342 | 1.417992  | 0.623387  |
| 48 | 6  | 0 | -1.471734 | 1.969135  | 4.187580  |
| 49 | 1  | 0 | 0.454764  | 2.015924  | 3.206844  |
| 50 | 6  | 0 | -2.863106 | 1.830382  | 4.019612  |
| 51 | 1  | 0 | -4.478790 | 1.526112  | 2.604959  |
| 52 | 1  | 0 | -1.054316 | 2.129479  | 5.177703  |
| 53 | 1  | 0 | -3.520901 | 1.882376  | 4.883127  |
| 54 | 6  | 0 | -0.568095 | 2.883610  | -0.937729 |
| 55 | 6  | 0 | -0.992315 | 4.166840  | -0.534961 |
| 56 | 6  | 0 | -0.515780 | 2.536535  | -2.301598 |
| 57 | 6  | 0 | -1.361967 | 5.109602  | -1.510837 |
| 58 | 1  | 0 | -1.045582 | 4.434271  | 0.518021  |
| 59 | 6  | 0 | -0.890497 | 3.484629  | -3.271063 |
| 60 | 1  | 0 | -0.192878 | 1.541085  | -2.591671 |
| 61 | 6  | 0 | -1.310275 | 4.769799  | -2.877299 |
| 62 | 1  | 0 | -1.689025 | 6.100042  | -1.207221 |
| 63 | 1  | 0 | -0.853560 | 3.223352  | -4.325044 |
| 64 | 1  | 0 | -1.597279 | 5.501207  | -3.628060 |

---

### Standard orientations for **TS-AB**

| Center Number | Atomic Number | Atomic Type | Coordinates (Angstroms) |           |           |
|---------------|---------------|-------------|-------------------------|-----------|-----------|
|               |               |             | X                       | Y         | Z         |
| 1             | 44            | 0           | 0.523139                | -1.754429 | -0.132475 |
| 2             | 6             | 0           | -0.158882               | -3.692242 | -1.204643 |
| 3             | 6             | 0           | 1.045272                | -3.996034 | -0.472673 |
| 4             | 6             | 0           | 2.105503                | -3.186280 | -1.019023 |
| 5             | 6             | 0           | 1.554137                | -2.353740 | -2.058815 |
| 6             | 6             | 0           | 0.140898                | -2.669988 | -2.173678 |
| 7             | 6             | 0           | -1.435886               | -1.683791 | 0.706998  |
| 8             | 6             | 0           | -0.784447               | -1.639972 | 1.817991  |
| 9             | 1             | 0           | -0.897516               | -1.620422 | 2.886719  |
| 10            | 6             | 0           | 1.278830                | -1.229913 | 2.011031  |
| 11            | 1             | 0           | 1.221933                | -1.337851 | 3.079910  |
| 12            | 6             | 0           | 2.071107                | -0.892807 | 1.044359  |
| 13            | 6             | 0           | -2.757704               | -1.732411 | 0.093646  |
| 14            | 6             | 0           | -3.822276               | -2.383918 | 0.769111  |
| 15            | 6             | 0           | -3.000179               | -1.135316 | -1.167102 |
| 16            | 6             | 0           | -5.101286               | -2.433523 | 0.189954  |
| 17            | 1             | 0           | -3.641134               | -2.852315 | 1.733355  |
| 18            | 6             | 0           | -4.284142               | -1.179466 | -1.735177 |
| 19            | 1             | 0           | -2.185709               | -0.619706 | -1.667122 |
| 20            | 6             | 0           | -5.337269               | -1.831393 | -1.062320 |
| 21            | 1             | 0           | -5.910004               | -2.939788 | 0.710535  |
| 22            | 1             | 0           | -4.465284               | -0.711171 | -2.699259 |
| 23            | 1             | 0           | -6.327665               | -1.872005 | -1.507899 |
| 24            | 6             | 0           | 3.380826                | -0.324293 | 0.742134  |
| 25            | 6             | 0           | 4.377168                | -0.264372 | 1.753223  |
| 26            | 6             | 0           | 3.679405                | 0.183257  | -0.545820 |
| 27            | 6             | 0           | 5.638463                | 0.284151  | 1.473260  |
| 28            | 1             | 0           | 4.162556                | -0.658323 | 2.743504  |
| 29            | 6             | 0           | 4.939743                | 0.741176  | -0.818114 |
| 30            | 1             | 0           | 2.915656                | 0.147205  | -1.317310 |
| 31            | 6             | 0           | 5.924290                | 0.789711  | 0.187960  |

|    |    |   |           |           |           |
|----|----|---|-----------|-----------|-----------|
| 32 | 1  | 0 | 6.397710  | 0.316793  | 2.250196  |
| 33 | 1  | 0 | 5.156668  | 1.132164  | -1.808644 |
| 34 | 1  | 0 | 6.902190  | 1.212923  | -0.025081 |
| 35 | 1  | 0 | -1.130930 | -4.133859 | -1.034540 |
| 36 | 1  | 0 | 1.142890  | -4.723987 | 0.320502  |
| 37 | 1  | 0 | 3.134598  | -3.185117 | -0.687415 |
| 38 | 1  | 0 | 2.103366  | -1.671085 | -2.689731 |
| 39 | 1  | 0 | -0.548805 | -2.253924 | -2.892970 |
| 40 | 1  | 0 | 1.452053  | 1.940198  | 0.609270  |
| 41 | 15 | 0 | 0.140542  | 1.718715  | 0.091457  |
| 42 | 8  | 0 | 0.028741  | 0.269037  | -0.685891 |
| 43 | 6  | 0 | -0.949718 | 2.002622  | 1.555886  |
| 44 | 6  | 0 | -2.352396 | 1.999242  | 1.405099  |
| 45 | 6  | 0 | -0.364591 | 2.225627  | 2.819387  |
| 46 | 6  | 0 | -3.169012 | 2.225469  | 2.525962  |
| 47 | 1  | 0 | -2.806267 | 1.824781  | 0.432680  |
| 48 | 6  | 0 | -1.187982 | 2.458354  | 3.936426  |
| 49 | 1  | 0 | 0.717346  | 2.224418  | 2.940557  |
| 50 | 6  | 0 | -2.588822 | 2.457261  | 3.789937  |
| 51 | 1  | 0 | -4.249562 | 2.224571  | 2.414536  |
| 52 | 1  | 0 | -0.740768 | 2.641981  | 4.909390  |
| 53 | 1  | 0 | -3.223956 | 2.638897  | 4.652890  |
| 54 | 6  | 0 | -0.191284 | 3.014498  | -1.189072 |
| 55 | 6  | 0 | -0.371639 | 4.360817  | -0.810373 |
| 56 | 6  | 0 | -0.239872 | 2.632843  | -2.543836 |
| 57 | 6  | 0 | -0.595234 | 5.332485  | -1.802178 |
| 58 | 1  | 0 | -0.349487 | 4.656600  | 0.236235  |
| 59 | 6  | 0 | -0.469348 | 3.610770  | -3.529034 |
| 60 | 1  | 0 | -0.107845 | 1.588907  | -2.812431 |
| 61 | 6  | 0 | -0.643106 | 4.958589  | -3.160010 |
| 62 | 1  | 0 | -0.733631 | 6.371688  | -1.517499 |
| 63 | 1  | 0 | -0.510414 | 3.323413  | -4.576046 |
| 64 | 1  | 0 | -0.817557 | 5.712385  | -3.923136 |

---

## Standard orientations for **B**

| Center Number | Atomic Number | Atomic Type | Coordinates (Angstroms) |           |           |
|---------------|---------------|-------------|-------------------------|-----------|-----------|
|               |               |             | X                       | Y         | Z         |
| 1             | 44            | 0           | -0.119320               | -1.373779 | -0.568992 |
| 2             | 6             | 0           | -0.553521               | -3.519736 | -1.151827 |
| 3             | 6             | 0           | 0.829726                | -3.322910 | -1.534887 |
| 4             | 6             | 0           | 0.860992                | -2.433030 | -2.657159 |
| 5             | 6             | 0           | -0.488148               | -2.075260 | -2.983159 |
| 6             | 6             | 0           | -1.363815               | -2.745388 | -2.068371 |
| 7             | 6             | 0           | -1.678037               | -1.179577 | 0.635893  |
| 8             | 6             | 0           | -1.402209               | -1.371841 | 2.021987  |
| 9             | 1             | 0           | -2.154414               | -1.238352 | 2.798425  |
| 10            | 6             | 0           | -0.068993               | -1.681183 | 2.308963  |
| 11            | 1             | 0           | 0.296532                | -1.811478 | 3.326600  |
| 12            | 6             | 0           | 0.776284                | -1.751439 | 1.161425  |
| 13            | 6             | 0           | -3.048590               | -0.935313 | 0.157885  |
| 14            | 6             | 0           | -4.174510               | -1.507366 | 0.815687  |
| 15            | 6             | 0           | -3.280139               | -0.118427 | -0.982179 |
| 16            | 6             | 0           | -5.475314               | -1.280708 | 0.341756  |
| 17            | 1             | 0           | -4.024653               | -2.151474 | 1.678712  |
| 18            | 6             | 0           | -4.582923               | 0.115496  | -1.449371 |
| 19            | 1             | 0           | -2.433484               | 0.349747  | -1.478358 |
| 20            | 6             | 0           | -5.685097               | -0.467878 | -0.792111 |
| 21            | 1             | 0           | -6.322884               | -1.736816 | 0.846593  |
| 22            | 1             | 0           | -4.742418               | 0.750288  | -2.317096 |
| 23            | 1             | 0           | -6.693914               | -0.291670 | -1.156254 |
| 24            | 6             | 0           | 2.189650                | -2.149258 | 1.277951  |
| 25            | 6             | 0           | 2.633188                | -3.025241 | 2.310176  |
| 26            | 6             | 0           | 3.155628                | -1.659381 | 0.355527  |
| 27            | 6             | 0           | 3.981926                | -3.397376 | 2.407776  |
| 28            | 1             | 0           | 1.915026                | -3.434314 | 3.016056  |
| 29            | 6             | 0           | 4.507076                | -2.023834 | 0.461043  |
| 30            | 1             | 0           | 2.839402                | -0.979312 | -0.431481 |
| 31            | 6             | 0           | 4.925259                | -2.896267 | 1.485858  |

|    |    |   |           |           |           |
|----|----|---|-----------|-----------|-----------|
| 32 | 1  | 0 | 4.300395  | -4.077185 | 3.193603  |
| 33 | 1  | 0 | 5.232290  | -1.631505 | -0.247088 |
| 34 | 1  | 0 | 5.970458  | -3.183132 | 1.566137  |
| 35 | 1  | 0 | -0.917550 | -4.222114 | -0.415385 |
| 36 | 1  | 0 | 1.684586  | -3.796321 | -1.074134 |
| 37 | 1  | 0 | 1.751578  | -2.085077 | -3.164206 |
| 38 | 1  | 0 | -0.794170 | -1.408601 | -3.779052 |
| 39 | 1  | 0 | -2.443344 | -2.707610 | -2.077675 |
| 40 | 1  | 0 | 1.274171  | 1.221611  | 1.537792  |
| 41 | 15 | 0 | 0.753389  | 1.790946  | 0.337238  |
| 42 | 8  | 0 | 0.485690  | 0.584394  | -0.769383 |
| 43 | 6  | 0 | -0.742201 | 2.721691  | 0.869572  |
| 44 | 6  | 0 | -1.315320 | 3.680157  | 0.005544  |
| 45 | 6  | 0 | -1.319082 | 2.451378  | 2.128441  |
| 46 | 6  | 0 | -2.468194 | 4.372983  | 0.410926  |
| 47 | 1  | 0 | -0.867300 | 3.894524  | -0.961706 |
| 48 | 6  | 0 | -2.468983 | 3.154033  | 2.528942  |
| 49 | 1  | 0 | -0.882537 | 1.709184  | 2.793646  |
| 50 | 6  | 0 | -3.044031 | 4.111210  | 1.670779  |
| 51 | 1  | 0 | -2.911950 | 5.114400  | -0.247303 |
| 52 | 1  | 0 | -2.912770 | 2.955914  | 3.500319  |
| 53 | 1  | 0 | -3.933268 | 4.652488  | 1.982315  |
| 54 | 6  | 0 | 1.997191  | 2.934178  | -0.407334 |
| 55 | 6  | 0 | 2.384903  | 4.105523  | 0.276677  |
| 56 | 6  | 0 | 2.553553  | 2.606587  | -1.659472 |
| 57 | 6  | 0 | 3.346368  | 4.952742  | -0.301518 |
| 58 | 1  | 0 | 1.946932  | 4.367070  | 1.237677  |
| 59 | 6  | 0 | 3.510475  | 3.464694  | -2.232120 |
| 60 | 1  | 0 | 2.232671  | 1.705436  | -2.173945 |
| 61 | 6  | 0 | 3.908735  | 4.632562  | -1.553838 |
| 62 | 1  | 0 | 3.652410  | 5.855701  | 0.218927  |
| 63 | 1  | 0 | 3.940817  | 3.223114  | -3.199861 |
| 64 | 1  | 0 | 4.650006  | 5.291498  | -1.997887 |

---

### Standard orientations for **TS-BC**

| Center Number | Atomic Number | Atomic Type | Coordinates (Angstroms) |           |           |
|---------------|---------------|-------------|-------------------------|-----------|-----------|
|               |               |             | X                       | Y         | Z         |
| 1             | 44            | 0           | -0.582788               | -1.214903 | -0.590274 |
| 2             | 6             | 0           | -1.505789               | -3.311143 | -0.735516 |
| 3             | 6             | 0           | -0.106665               | -3.472428 | -1.044772 |
| 4             | 6             | 0           | 0.157396                | -2.848640 | -2.320846 |
| 5             | 6             | 0           | -1.052744               | -2.252101 | -2.773359 |
| 6             | 6             | 0           | -2.087265               | -2.525631 | -1.794908 |
| 7             | 6             | 0           | -2.005651               | -0.644100 | 0.682624  |
| 8             | 6             | 0           | -1.733812               | -0.834470 | 2.064754  |
| 9             | 1             | 0           | -2.451902               | -0.587116 | 2.845048  |
| 10            | 6             | 0           | -0.451781               | -1.303543 | 2.353499  |
| 11            | 1             | 0           | -0.125106               | -1.499688 | 3.374484  |
| 12            | 6             | 0           | 0.432845                | -1.413338 | 1.223684  |
| 13            | 6             | 0           | -3.309866               | -0.159199 | 0.207076  |
| 14            | 6             | 0           | -4.513936               | -0.458216 | 0.905323  |
| 15            | 6             | 0           | -3.390717               | 0.625705  | -0.975994 |
| 16            | 6             | 0           | -5.750060               | 0.004459  | 0.430730  |
| 17            | 1             | 0           | -4.481464               | -1.072394 | 1.801791  |
| 18            | 6             | 0           | -4.627499               | 1.097164  | -1.442086 |
| 19            | 1             | 0           | -2.476958               | 0.887839  | -1.503853 |
| 20            | 6             | 0           | -5.811322               | 0.785340  | -0.742859 |
| 21            | 1             | 0           | -6.662710               | -0.240977 | 0.967153  |
| 22            | 1             | 0           | -4.671491               | 1.708486  | -2.339367 |
| 23            | 1             | 0           | -6.769934               | 1.147120  | -1.105373 |
| 24            | 6             | 0           | 1.699832                | -2.186312 | 1.324474  |
| 25            | 6             | 0           | 1.914627                | -3.145654 | 2.351763  |
| 26            | 6             | 0           | 2.734418                | -1.987829 | 0.370864  |
| 27            | 6             | 0           | 3.115165                | -3.870087 | 2.422513  |
| 28            | 1             | 0           | 1.136397                | -3.341535 | 3.084575  |
| 29            | 6             | 0           | 3.936729                | -2.707900 | 0.444739  |
| 30            | 1             | 0           | 2.594942                | -1.268403 | -0.432243 |
| 31            | 6             | 0           | 4.133412                | -3.652677 | 1.471929  |



|    |    |   |           |           |           |
|----|----|---|-----------|-----------|-----------|
| 32 | 1  | 0 | 3.257438  | -4.604192 | 3.211253  |
| 33 | 1  | 0 | 4.717923  | -2.534782 | -0.290683 |
| 34 | 1  | 0 | 5.062827  | -4.212786 | 1.529699  |
| 35 | 1  | 0 | -2.027796 | -3.742958 | 0.105993  |
| 36 | 1  | 0 | 0.611080  | -4.019142 | -0.450833 |
| 37 | 1  | 0 | 1.117107  | -2.812298 | -2.818392 |
| 38 | 1  | 0 | -1.183252 | -1.684689 | -3.685553 |
| 39 | 1  | 0 | -3.126759 | -2.243446 | -1.879040 |
| 40 | 1  | 0 | 0.902267  | 0.006928  | 1.140626  |
| 41 | 15 | 0 | 1.089920  | 1.377389  | 0.216583  |
| 42 | 8  | 0 | 0.380723  | 0.458322  | -1.042427 |
| 43 | 6  | 0 | 0.055174  | 2.836574  | 0.692934  |
| 44 | 6  | 0 | 0.099228  | 4.023877  | -0.073477 |
| 45 | 6  | 0 | -0.784975 | 2.751922  | 1.824915  |
| 46 | 6  | 0 | -0.702772 | 5.117740  | 0.293225  |
| 47 | 1  | 0 | 0.749234  | 4.097747  | -0.941078 |
| 48 | 6  | 0 | -1.578774 | 3.853572  | 2.189691  |
| 49 | 1  | 0 | -0.818083 | 1.844640  | 2.421570  |
| 50 | 6  | 0 | -1.540280 | 5.034672  | 1.424194  |
| 51 | 1  | 0 | -0.672526 | 6.029516  | -0.296738 |
| 52 | 1  | 0 | -2.220117 | 3.791495  | 3.064368  |
| 53 | 1  | 0 | -2.154152 | 5.885428  | 1.707727  |
| 54 | 6  | 0 | 2.675459  | 2.011914  | -0.499231 |
| 55 | 6  | 0 | 3.465164  | 2.927870  | 0.230650  |
| 56 | 6  | 0 | 3.108116  | 1.533795  | -1.754243 |
| 57 | 6  | 0 | 4.689487  | 3.367546  | -0.302863 |
| 58 | 1  | 0 | 3.137200  | 3.300405  | 1.198654  |
| 59 | 6  | 0 | 4.329889  | 1.986977  | -2.284194 |
| 60 | 1  | 0 | 2.483614  | 0.841800  | -2.312175 |
| 61 | 6  | 0 | 5.122532  | 2.898298  | -1.559271 |
| 62 | 1  | 0 | 5.299528  | 4.071270  | 0.256483  |
| 63 | 1  | 0 | 4.659234  | 1.632937  | -3.257290 |
| 64 | 1  | 0 | 6.068143  | 3.242182  | -1.969866 |

---

### Standard orientations for C

| Center Number | Atomic Number | Atomic Type | Coordinates (Angstroms) |           |           |
|---------------|---------------|-------------|-------------------------|-----------|-----------|
|               |               |             | X                       | Y         | Z         |
| 1             | 44            | 0           | -0.948785               | -0.632819 | 0.658031  |
| 2             | 6             | 0           | -2.268978               | -2.243113 | 1.716969  |
| 3             | 6             | 0           | -3.098381               | -1.086535 | 1.607395  |
| 4             | 6             | 0           | -2.542989               | -0.025881 | 2.436692  |
| 5             | 6             | 0           | -1.335476               | -0.504624 | 2.998911  |
| 6             | 6             | 0           | -1.127983               | -1.874936 | 2.522849  |
| 7             | 6             | 0           | -0.195956               | -2.088974 | -0.478760 |
| 8             | 6             | 0           | -0.926040               | -2.405581 | -1.671503 |
| 9             | 1             | 0           | -0.661031               | -3.245934 | -2.310090 |
| 10            | 6             | 0           | -1.982219               | -1.570075 | -1.986058 |
| 11            | 1             | 0           | -2.694630               | -1.819334 | -2.772101 |
| 12            | 6             | 0           | -2.096540               | -0.315030 | -1.254500 |
| 13            | 6             | 0           | 0.912186                | -2.934296 | -0.018614 |
| 14            | 6             | 0           | 0.996539                | -4.311403 | -0.378948 |
| 15            | 6             | 0           | 1.926082                | -2.393462 | 0.820943  |
| 16            | 6             | 0           | 2.046183                | -5.112252 | 0.091711  |
| 17            | 1             | 0           | 0.229470                | -4.760438 | -1.003875 |
| 18            | 6             | 0           | 2.983570                | -3.192846 | 1.275348  |
| 19            | 1             | 0           | 1.895502                | -1.339526 | 1.081387  |
| 20            | 6             | 0           | 3.044714                | -4.555865 | 0.918492  |
| 21            | 1             | 0           | 2.089955                | -6.163105 | -0.180681 |
| 22            | 1             | 0           | 3.759947                | -2.758980 | 1.899132  |
| 23            | 1             | 0           | 3.860667                | -5.177362 | 1.277881  |
| 24            | 6             | 0           | -3.357812               | 0.457278  | -1.238750 |
| 25            | 6             | 0           | -4.617484               | -0.164569 | -1.448017 |
| 26            | 6             | 0           | -3.322386               | 1.858685  | -1.017412 |
| 27            | 6             | 0           | -5.798642               | 0.593313  | -1.447033 |
| 28            | 1             | 0           | -4.675153               | -1.238423 | -1.615457 |
| 29            | 6             | 0           | -4.504920               | 2.614757  | -1.009673 |
| 30            | 1             | 0           | -2.365017               | 2.353928  | -0.868448 |
| 31            | 6             | 0           | -5.747810               | 1.985690  | -1.225927 |

|    |    |   |           |           |           |
|----|----|---|-----------|-----------|-----------|
| 32 | 1  | 0 | -6.755226 | 0.106651  | -1.617787 |
| 33 | 1  | 0 | -4.460145 | 3.688315  | -0.848287 |
| 34 | 1  | 0 | -6.663209 | 2.571136  | -1.226842 |
| 35 | 1  | 0 | -2.449439 | -3.208890 | 1.267945  |
| 36 | 1  | 0 | -4.016266 | -1.013238 | 1.042885  |
| 37 | 1  | 0 | -2.968433 | 0.960706  | 2.559291  |
| 38 | 1  | 0 | -0.663229 | 0.042746  | 3.645504  |
| 39 | 1  | 0 | -0.323417 | -2.532631 | 2.820750  |
| 40 | 1  | 0 | -1.211579 | 0.322551  | -1.436584 |
| 41 | 15 | 0 | 0.990290  | 1.729760  | -0.867713 |
| 42 | 8  | 0 | 0.255455  | 0.838781  | 0.484204  |
| 43 | 6  | 0 | 2.574717  | 0.768864  | -1.186760 |
| 44 | 6  | 0 | 3.698756  | 0.844509  | -0.333702 |
| 45 | 6  | 0 | 2.625002  | -0.047656 | -2.338643 |
| 46 | 6  | 0 | 4.855941  | 0.101764  | -0.628425 |
| 47 | 1  | 0 | 3.677028  | 1.489708  | 0.540649  |
| 48 | 6  | 0 | 3.785172  | -0.788622 | -2.632964 |
| 49 | 1  | 0 | 1.772072  | -0.092086 | -3.013460 |
| 50 | 6  | 0 | 4.900302  | -0.715528 | -1.776848 |
| 51 | 1  | 0 | 5.722083  | 0.169567  | 0.025020  |
| 52 | 1  | 0 | 3.822234  | -1.407022 | -3.525921 |
| 53 | 1  | 0 | 5.800331  | -1.280012 | -2.007331 |
| 54 | 6  | 0 | 1.601407  | 3.221927  | 0.096335  |
| 55 | 6  | 0 | 2.408851  | 4.170933  | -0.569963 |
| 56 | 6  | 0 | 1.207795  | 3.451234  | 1.429983  |
| 57 | 6  | 0 | 2.829241  | 5.333880  | 0.100954  |
| 58 | 1  | 0 | 2.717106  | 4.011245  | -1.601671 |
| 59 | 6  | 0 | 1.631738  | 4.616415  | 2.098235  |
| 60 | 1  | 0 | 0.585186  | 2.720550  | 1.937167  |
| 61 | 6  | 0 | 2.441457  | 5.559111  | 1.436694  |
| 62 | 1  | 0 | 3.452347  | 6.058714  | -0.416269 |
| 63 | 1  | 0 | 1.330261  | 4.786650  | 3.128834  |
| 64 | 1  | 0 | 2.764909  | 6.459223  | 1.952990  |

---

### Standard orientations for TS-CD

| Center Number | Atomic Number | Atomic Type | Coordinates (Angstroms) |           |           |
|---------------|---------------|-------------|-------------------------|-----------|-----------|
|               |               |             | X                       | Y         | Z         |
| 1             | 44            | 0           | 0.855390                | -0.808694 | -0.701248 |
| 2             | 6             | 0           | 1.802483                | -2.870488 | -0.500619 |
| 3             | 6             | 0           | 2.834301                | -2.098830 | -1.117384 |
| 4             | 6             | 0           | 2.399855                | -1.698648 | -2.441245 |
| 5             | 6             | 0           | 1.078499                | -2.180001 | -2.631055 |
| 6             | 6             | 0           | 0.675656                | -2.887450 | -1.419689 |
| 7             | 6             | 0           | -0.276389               | -0.928105 | 1.055631  |
| 8             | 6             | 0           | 0.410442                | -0.353704 | 2.221905  |
| 9             | 1             | 0           | -0.037437               | -0.385124 | 3.213795  |
| 10            | 6             | 0           | 1.632691                | 0.210709  | 2.008709  |
| 11            | 1             | 0           | 2.245557                | 0.579871  | 2.829748  |
| 12            | 6             | 0           | 2.097260                | 0.368242  | 0.613281  |
| 13            | 6             | 0           | -1.215217               | -2.070726 | 1.289567  |
| 14            | 6             | 0           | -1.134723               | -2.820771 | 2.493177  |
| 15            | 6             | 0           | -2.164936               | -2.482456 | 0.317293  |
| 16            | 6             | 0           | -1.967437               | -3.933390 | 2.712314  |
| 17            | 1             | 0           | -0.408575               | -2.554880 | 3.255393  |
| 18            | 6             | 0           | -3.007307               | -3.578440 | 0.543012  |
| 19            | 1             | 0           | -2.253653               | -1.933899 | -0.616113 |
| 20            | 6             | 0           | -2.912212               | -4.314433 | 1.743687  |
| 21            | 1             | 0           | -1.879716               | -4.495388 | 3.638378  |
| 22            | 1             | 0           | -3.738515               | -3.860525 | -0.209935 |
| 23            | 1             | 0           | -3.563674               | -5.166420 | 1.917526  |
| 24            | 6             | 0           | 3.534380                | 0.605149  | 0.346291  |
| 25            | 6             | 0           | 4.540907                | 0.079651  | 1.198952  |
| 26            | 6             | 0           | 3.931875                | 1.364500  | -0.784881 |
| 27            | 6             | 0           | 5.898810                | 0.302712  | 0.922856  |
| 28            | 1             | 0           | 4.261996                | -0.510378 | 2.068994  |
| 29            | 6             | 0           | 5.290447                | 1.587270  | -1.059972 |
| 30            | 1             | 0           | 3.172499                | 1.794971  | -1.435739 |
| 31            | 6             | 0           | 6.279672                | 1.056037  | -0.207792 |

|    |    |   |           |           |           |
|----|----|---|-----------|-----------|-----------|
| 32 | 1  | 0 | 6.659765  | -0.105396 | 1.582715  |
| 33 | 1  | 0 | 5.579089  | 2.179157  | -1.924302 |
| 34 | 1  | 0 | 7.331522  | 1.231032  | -0.416812 |
| 35 | 1  | 0 | 1.850143  | -3.370266 | 0.455951  |
| 36 | 1  | 0 | 3.794884  | -1.868375 | -0.681414 |
| 37 | 1  | 0 | 2.976748  | -1.109981 | -3.141504 |
| 38 | 1  | 0 | 0.460723  | -2.028537 | -3.505935 |
| 39 | 1  | 0 | -0.241299 | -3.439385 | -1.277415 |
| 40 | 1  | 0 | 1.471647  | 1.124637  | 0.071510  |
| 41 | 15 | 0 | -1.589659 | 0.794180  | 0.087188  |
| 42 | 8  | 0 | -0.696316 | 0.279681  | -1.298743 |
| 43 | 6  | 0 | -3.334306 | 1.000479  | -0.539743 |
| 44 | 6  | 0 | -3.701406 | 0.402218  | -1.763901 |
| 45 | 6  | 0 | -4.282687 | 1.721104  | 0.218577  |
| 46 | 6  | 0 | -5.018902 | 0.542900  | -2.236290 |
| 47 | 1  | 0 | -2.959314 | -0.129813 | -2.353040 |
| 48 | 6  | 0 | -5.599905 | 1.847581  | -0.256372 |
| 49 | 1  | 0 | -4.005260 | 2.193079  | 1.158508  |
| 50 | 6  | 0 | -5.969474 | 1.258457  | -1.482224 |
| 51 | 1  | 0 | -5.300365 | 0.099917  | -3.187808 |
| 52 | 1  | 0 | -6.330789 | 2.405639  | 0.322306  |
| 53 | 1  | 0 | -6.987799 | 1.360704  | -1.847734 |
| 54 | 6  | 0 | -0.971048 | 2.509232  | 0.484158  |
| 55 | 6  | 0 | -0.965833 | 2.959933  | 1.820574  |
| 56 | 6  | 0 | -0.539170 | 3.359472  | -0.557955 |
| 57 | 6  | 0 | -0.536329 | 4.268032  | 2.115439  |
| 58 | 1  | 0 | -1.289683 | 2.306314  | 2.628137  |
| 59 | 6  | 0 | -0.103583 | 4.662000  | -0.254922 |
| 60 | 1  | 0 | -0.550953 | 3.011668  | -1.588027 |
| 61 | 6  | 0 | -0.104627 | 5.117784  | 1.079197  |
| 62 | 1  | 0 | -0.538609 | 4.619020  | 3.143753  |
| 63 | 1  | 0 | 0.222645  | 5.321098  | -1.054999 |
| 64 | 1  | 0 | 0.225960  | 6.127529  | 1.307664  |

---

### Standard orientations for **D**

| Center Number | Atomic Number | Atomic Type | Coordinates (Angstroms) |           |           |
|---------------|---------------|-------------|-------------------------|-----------|-----------|
|               |               |             | X                       | Y         | Z         |
| 1             | 44            | 0           | 0.953080                | -0.608845 | -0.808894 |
| 2             | 6             | 0           | 1.657049                | -2.704274 | -0.422611 |
| 3             | 6             | 0           | 2.804206                | -2.065162 | -0.994867 |
| 4             | 6             | 0           | 2.519548                | -1.734298 | -2.377301 |
| 5             | 6             | 0           | 1.179710                | -2.111314 | -2.649649 |
| 6             | 6             | 0           | 0.613083                | -2.689787 | -1.435921 |
| 7             | 6             | 0           | -0.441714               | -0.448018 | 0.882407  |
| 8             | 6             | 0           | 0.243377                | 0.268677  | 2.015412  |
| 9             | 1             | 0           | -0.283039               | 0.420979  | 2.957998  |
| 10            | 6             | 0           | 1.512827                | 0.698394  | 1.845193  |
| 11            | 1             | 0           | 2.064957                | 1.185271  | 2.647873  |
| 12            | 6             | 0           | 2.142472                | 0.563512  | 0.502389  |
| 13            | 6             | 0           | -1.132729               | -1.735354 | 1.288158  |
| 14            | 6             | 0           | -0.760742               | -2.370800 | 2.501285  |
| 15            | 6             | 0           | -2.112348               | -2.377569 | 0.487852  |
| 16            | 6             | 0           | -1.344685               | -3.587307 | 2.898645  |
| 17            | 1             | 0           | -0.005642               | -1.920386 | 3.139087  |
| 18            | 6             | 0           | -2.701701               | -3.587596 | 0.887891  |
| 19            | 1             | 0           | -2.424844               | -1.942620 | -0.456729 |
| 20            | 6             | 0           | -2.322836               | -4.202617 | 2.097096  |
| 21            | 1             | 0           | -1.038479               | -4.048363 | 3.834304  |
| 22            | 1             | 0           | -3.456280               | -4.050010 | 0.256459  |
| 23            | 1             | 0           | -2.780157               | -5.138505 | 2.405885  |
| 24            | 6             | 0           | 3.619019                | 0.634091  | 0.408825  |
| 25            | 6             | 0           | 4.443363                | 0.159319  | 1.463190  |
| 26            | 6             | 0           | 4.240726                | 1.172854  | -0.748113 |
| 27            | 6             | 0           | 5.841720                | 0.209831  | 1.354252  |
| 28            | 1             | 0           | 3.990069                | -0.258918 | 2.358553  |
| 29            | 6             | 0           | 5.639243                | 1.228498  | -0.853363 |
| 30            | 1             | 0           | 3.623652                | 1.567588  | -1.553999 |
| 31            | 6             | 0           | 6.445863                | 0.744220  | 0.196708  |

|    |    |   |           |           |           |
|----|----|---|-----------|-----------|-----------|
| 32 | 1  | 0 | 6.461555  | -0.160754 | 2.166297  |
| 33 | 1  | 0 | 6.100325  | 1.655488  | -1.739783 |
| 34 | 1  | 0 | 7.528687  | 0.790045  | 0.118728  |
| 35 | 1  | 0 | 1.579511  | -3.140927 | 0.562248  |
| 36 | 1  | 0 | 3.743754  | -1.891123 | -0.492316 |
| 37 | 1  | 0 | 3.201000  | -1.246856 | -3.061466 |
| 38 | 1  | 0 | 0.651001  | -1.965298 | -3.581937 |
| 39 | 1  | 0 | -0.357701 | -3.151364 | -1.341216 |
| 40 | 1  | 0 | 1.682393  | 1.273745  | -0.253953 |
| 41 | 15 | 0 | -1.520708 | 0.776636  | -0.179223 |
| 42 | 8  | 0 | -0.622134 | 0.465007  | -1.583435 |
| 43 | 6  | 0 | -3.317621 | 0.514712  | -0.563401 |
| 44 | 6  | 0 | -3.677924 | 0.314946  | -1.912031 |
| 45 | 6  | 0 | -4.295047 | 0.555541  | 0.451277  |
| 46 | 6  | 0 | -5.036458 | 0.161521  | -2.244190 |
| 47 | 1  | 0 | -2.911402 | 0.285014  | -2.681960 |
| 48 | 6  | 0 | -5.649126 | 0.395328  | 0.108637  |
| 49 | 1  | 0 | -4.022084 | 0.691502  | 1.495336  |
| 50 | 6  | 0 | -6.020311 | 0.201544  | -1.237070 |
| 51 | 1  | 0 | -5.323781 | 0.014949  | -3.281601 |
| 52 | 1  | 0 | -6.408264 | 0.420066  | 0.885233  |
| 53 | 1  | 0 | -7.068436 | 0.081604  | -1.497587 |
| 54 | 6  | 0 | -1.249730 | 2.553935  | 0.278530  |
| 55 | 6  | 0 | -1.728914 | 3.069331  | 1.500796  |
| 56 | 6  | 0 | -0.584481 | 3.387165  | -0.643189 |
| 57 | 6  | 0 | -1.537471 | 4.429132  | 1.800565  |
| 58 | 1  | 0 | -2.246103 | 2.434185  | 2.216962  |
| 59 | 6  | 0 | -0.397305 | 4.747452  | -0.334628 |
| 60 | 1  | 0 | -0.235221 | 2.982041  | -1.589779 |
| 61 | 6  | 0 | -0.872030 | 5.268127  | 0.884165  |
| 62 | 1  | 0 | -1.906479 | 4.831760  | 2.739666  |
| 63 | 1  | 0 | 0.108219  | 5.396481  | -1.044255 |
| 64 | 1  | 0 | -0.729259 | 6.319782  | 1.117478  |

---

### Standard orientations for **TS-DE**

| Center Number | Atomic Number | Atomic Type | Coordinates (Angstroms) |           |           |
|---------------|---------------|-------------|-------------------------|-----------|-----------|
|               |               |             | X                       | Y         | Z         |
| 1             | 44            | 0           | 0.851940                | -1.191499 | -0.534814 |
| 2             | 6             | 0           | 1.574674                | -3.311824 | 0.131683  |
| 3             | 6             | 0           | 2.711926                | -2.637173 | -0.417466 |
| 4             | 6             | 0           | 2.469729                | -2.332982 | -1.815178 |
| 5             | 6             | 0           | 1.140997                | -2.764181 | -2.114117 |
| 6             | 6             | 0           | 0.567722                | -3.359829 | -0.899826 |
| 7             | 6             | 0           | -0.724633               | -0.525790 | 0.917169  |
| 8             | 6             | 0           | 0.227062                | -0.254458 | 2.019490  |
| 9             | 1             | 0           | -0.088736               | -0.514688 | 3.029812  |
| 10            | 6             | 0           | 1.552420                | 0.119417  | 1.875071  |
| 11            | 1             | 0           | 2.167982                | 0.183437  | 2.769057  |
| 12            | 6             | 0           | 2.172704                | 0.259157  | 0.572890  |
| 13            | 6             | 0           | -1.936204               | -1.365340 | 1.275908  |
| 14            | 6             | 0           | -2.484190               | -1.378016 | 2.582220  |
| 15            | 6             | 0           | -2.584893               | -2.139195 | 0.282969  |
| 16            | 6             | 0           | -3.619554               | -2.150608 | 2.887368  |
| 17            | 1             | 0           | -2.045037               | -0.779752 | 3.376726  |
| 18            | 6             | 0           | -3.724106               | -2.904043 | 0.582006  |
| 19            | 1             | 0           | -2.192515               | -2.142547 | -0.730646 |
| 20            | 6             | 0           | -4.245332               | -2.920049 | 1.889768  |
| 21            | 1             | 0           | -4.016348               | -2.145668 | 3.899446  |
| 22            | 1             | 0           | -4.201558               | -3.487842 | -0.200988 |
| 23            | 1             | 0           | -5.122329               | -3.516630 | 2.125527  |
| 24            | 6             | 0           | 3.622782                | 0.390094  | 0.391466  |
| 25            | 6             | 0           | 4.555892                | 0.004161  | 1.392596  |
| 26            | 6             | 0           | 4.119135                | 0.921393  | -0.830280 |
| 27            | 6             | 0           | 5.933332                | 0.152028  | 1.177330  |
| 28            | 1             | 0           | 4.210137                | -0.415887 | 2.333356  |
| 29            | 6             | 0           | 5.496908                | 1.069642  | -1.043014 |
| 30            | 1             | 0           | 3.416670                | 1.222045  | -1.605326 |
| 31            | 6             | 0           | 6.410000                | 0.685742  | -0.039261 |



|    |    |   |           |           |           |
|----|----|---|-----------|-----------|-----------|
| 32 | 1  | 0 | 6.637130  | -0.144966 | 1.949979  |
| 33 | 1  | 0 | 5.860975  | 1.484285  | -1.978810 |
| 34 | 1  | 0 | 7.478347  | 0.800707  | -0.201072 |
| 35 | 1  | 0 | 1.478816  | -3.695388 | 1.137448  |
| 36 | 1  | 0 | 3.620777  | -2.404325 | 0.118983  |
| 37 | 1  | 0 | 3.165015  | -1.865303 | -2.496359 |
| 38 | 1  | 0 | 0.644677  | -2.683403 | -3.071731 |
| 39 | 1  | 0 | -0.396229 | -3.841275 | -0.820272 |
| 40 | 1  | 0 | 1.610990  | 0.827098  | -0.189454 |
| 41 | 15 | 0 | -1.174405 | 0.878412  | -0.305939 |
| 42 | 8  | 0 | -0.293377 | 0.240323  | -1.592650 |
| 43 | 6  | 0 | -2.940936 | 1.026520  | -0.830740 |
| 44 | 6  | 0 | -3.284217 | 0.575888  | -2.121011 |
| 45 | 6  | 0 | -3.908600 | 1.595951  | 0.021646  |
| 46 | 6  | 0 | -4.613576 | 0.703674  | -2.562205 |
| 47 | 1  | 0 | -2.521490 | 0.149544  | -2.766999 |
| 48 | 6  | 0 | -5.236231 | 1.709495  | -0.424976 |
| 49 | 1  | 0 | -3.647066 | 1.948676  | 1.016595  |
| 50 | 6  | 0 | -5.588475 | 1.265803  | -1.715684 |
| 51 | 1  | 0 | -4.885161 | 0.368816  | -3.559424 |
| 52 | 1  | 0 | -5.989488 | 2.143976  | 0.226138  |
| 53 | 1  | 0 | -6.615260 | 1.360903  | -2.058828 |
| 54 | 6  | 0 | -0.520272 | 2.550503  | 0.159172  |
| 55 | 6  | 0 | -0.714129 | 3.071773  | 1.454601  |
| 56 | 6  | 0 | 0.122901  | 3.315204  | -0.836814 |
| 57 | 6  | 0 | -0.262815 | 4.369713  | 1.753493  |
| 58 | 1  | 0 | -1.200162 | 2.481553  | 2.228658  |
| 59 | 6  | 0 | 0.574054  | 4.611397  | -0.528005 |
| 60 | 1  | 0 | 0.263860  | 2.906819  | -1.834786 |
| 61 | 6  | 0 | 0.379695  | 5.139280  | 0.763397  |
| 62 | 1  | 0 | -0.411770 | 4.777432  | 2.749400  |
| 63 | 1  | 0 | 1.067331  | 5.206878  | -1.291167 |
| 64 | 1  | 0 | 0.725574  | 6.142621  | 0.996827  |

---

### Standard orientations for E

| Center Number | Atomic Number | Atomic Type | Coordinates (Angstroms) |           |           |
|---------------|---------------|-------------|-------------------------|-----------|-----------|
|               |               |             | X                       | Y         | Z         |
| 1             | 44            | 0           | 0.965408                | -1.316382 | -0.227030 |
| 2             | 6             | 0           | 0.670130                | -3.547643 | -0.099000 |
| 3             | 6             | 0           | 2.077531                | -3.278430 | 0.062068  |
| 4             | 6             | 0           | 2.563911                | -2.685916 | -1.171821 |
| 5             | 6             | 0           | 1.459038                | -2.580135 | -2.076731 |
| 6             | 6             | 0           | 0.274037                | -3.097439 | -1.419869 |
| 7             | 6             | 0           | -0.786948               | -0.401394 | 0.977224  |
| 8             | 6             | 0           | 0.393851                | -0.503952 | 1.785916  |
| 9             | 1             | 0           | 0.271737                | -1.161025 | 2.645808  |
| 10            | 6             | 0           | 1.771541                | -0.118390 | 1.561660  |
| 11            | 1             | 0           | 2.449477                | -0.578064 | 2.276585  |
| 12            | 6             | 0           | 2.346905                | 0.553942  | 0.461851  |
| 13            | 6             | 0           | -2.018438               | -1.096190 | 1.485730  |
| 14            | 6             | 0           | -2.418206               | -0.916628 | 2.832688  |
| 15            | 6             | 0           | -2.798709               | -1.933524 | 0.655131  |
| 16            | 6             | 0           | -3.563066               | -1.560515 | 3.335320  |
| 17            | 1             | 0           | -1.842180               | -0.266315 | 3.487943  |
| 18            | 6             | 0           | -3.942301               | -2.576664 | 1.157183  |
| 19            | 1             | 0           | -2.504949               | -2.090320 | -0.378437 |
| 20            | 6             | 0           | -4.329404               | -2.393898 | 2.499139  |
| 21            | 1             | 0           | -3.855938               | -1.409885 | 4.371030  |
| 22            | 1             | 0           | -4.527182               | -3.221123 | 0.506148  |
| 23            | 1             | 0           | -5.213357               | -2.893054 | 2.886613  |
| 24            | 6             | 0           | 3.799637                | 0.659991  | 0.233187  |
| 25            | 6             | 0           | 4.775335                | -0.030268 | 0.999128  |
| 26            | 6             | 0           | 4.240818                | 1.509025  | -0.813949 |
| 27            | 6             | 0           | 6.141953                | 0.133301  | 0.728993  |
| 28            | 1             | 0           | 4.479329                | -0.693493 | 1.808447  |
| 29            | 6             | 0           | 5.608547                | 1.669943v | -1.086154 |
| 30            | 1             | 0           | 3.504405                | 2.041399  | -1.412637 |
| 31            | 6             | 0           | 6.565711                | 0.983137  | -0.314464 |

|    |    |   |           |           |           |
|----|----|---|-----------|-----------|-----------|
| 32 | 1  | 0 | 6.878853  | -0.395839 | 1.327569  |
| 33 | 1  | 0 | 5.927635  | 2.326994  | -1.890558 |
| 34 | 1  | 0 | 7.625533  | 1.107274  | -0.519939 |
| 35 | 1  | 0 | 0.023765  | -4.012393 | 0.632800  |
| 36 | 1  | 0 | 2.677828  | -3.525000 | 0.926703  |
| 37 | 1  | 0 | 3.577315  | -2.362515 | -1.364633 |
| 38 | 1  | 0 | 1.495523  | -2.146927 | -3.067002 |
| 39 | 1  | 0 | -0.702218 | -3.209444 | -1.867982 |
| 40 | 1  | 0 | 1.752914  | 1.216760  | -0.156130 |
| 41 | 15 | 0 | -1.007872 | 0.879724  | -0.373833 |
| 42 | 8  | 0 | 0.226627  | 0.403443  | -1.391596 |
| 43 | 6  | 0 | -2.608634 | 0.735447  | -1.280759 |
| 44 | 6  | 0 | -2.593098 | 0.136713  | -2.556533 |
| 45 | 6  | 0 | -3.803591 | 1.242196  | -0.730810 |
| 46 | 6  | 0 | -3.792058 | 0.039569  | -3.285809 |
| 47 | 1  | 0 | -1.654445 | -0.219277 | -2.972578 |
| 48 | 6  | 0 | -4.998153 | 1.133180  | -1.463195 |
| 49 | 1  | 0 | -3.810943 | 1.715331  | 0.248133  |
| 50 | 6  | 0 | -4.992978 | 0.532015  | -2.738393 |
| 51 | 1  | 0 | -3.788200 | -0.409156 | -4.275245 |
| 52 | 1  | 0 | -5.924380 | 1.517699  | -1.045813 |
| 53 | 1  | 0 | -5.917824 | 0.456152  | -3.304166 |
| 54 | 6  | 0 | -0.856888 | 2.614551  | 0.260366  |
| 55 | 6  | 0 | -0.698551 | 2.886299  | 1.634578  |
| 56 | 6  | 0 | -0.903592 | 3.670422  | -0.678016 |
| 57 | 6  | 0 | -0.592286 | 4.219413  | 2.071577  |
| 58 | 1  | 0 | -0.659170 | 2.079362  | 2.360614  |
| 59 | 6  | 0 | -0.786268 | 4.998118  | -0.234506 |
| 60 | 1  | 0 | -1.027999 | 3.464894  | -1.738653 |
| 61 | 6  | 0 | -0.633381 | 5.273500  | 1.139543  |
| 62 | 1  | 0 | -0.476313 | 4.432604  | 3.130450  |
| 63 | 1  | 0 | -0.818060 | 5.812179  | -0.953043 |
| 64 | 1  | 0 | -0.548406 | 6.301941  | 1.479915  |

---

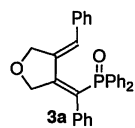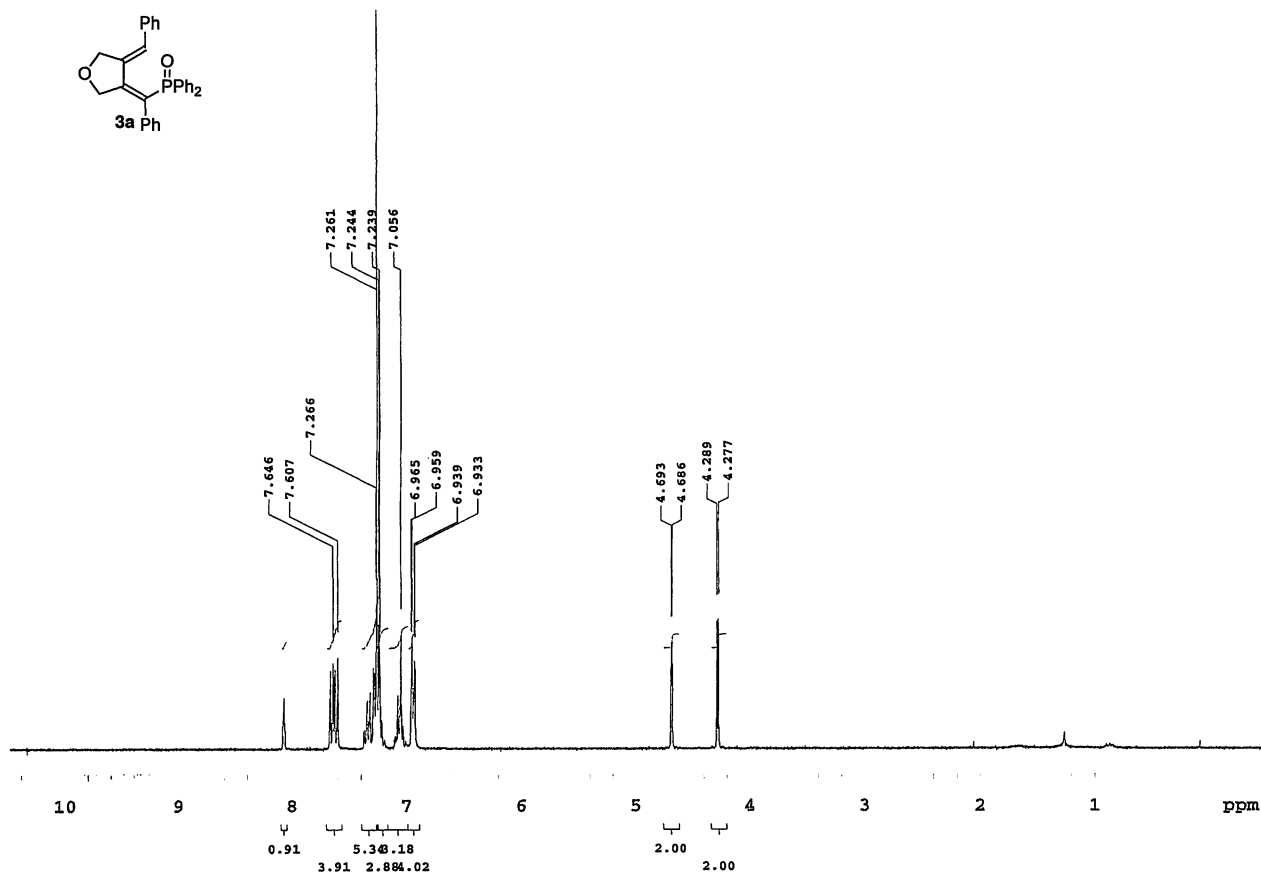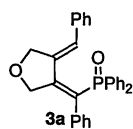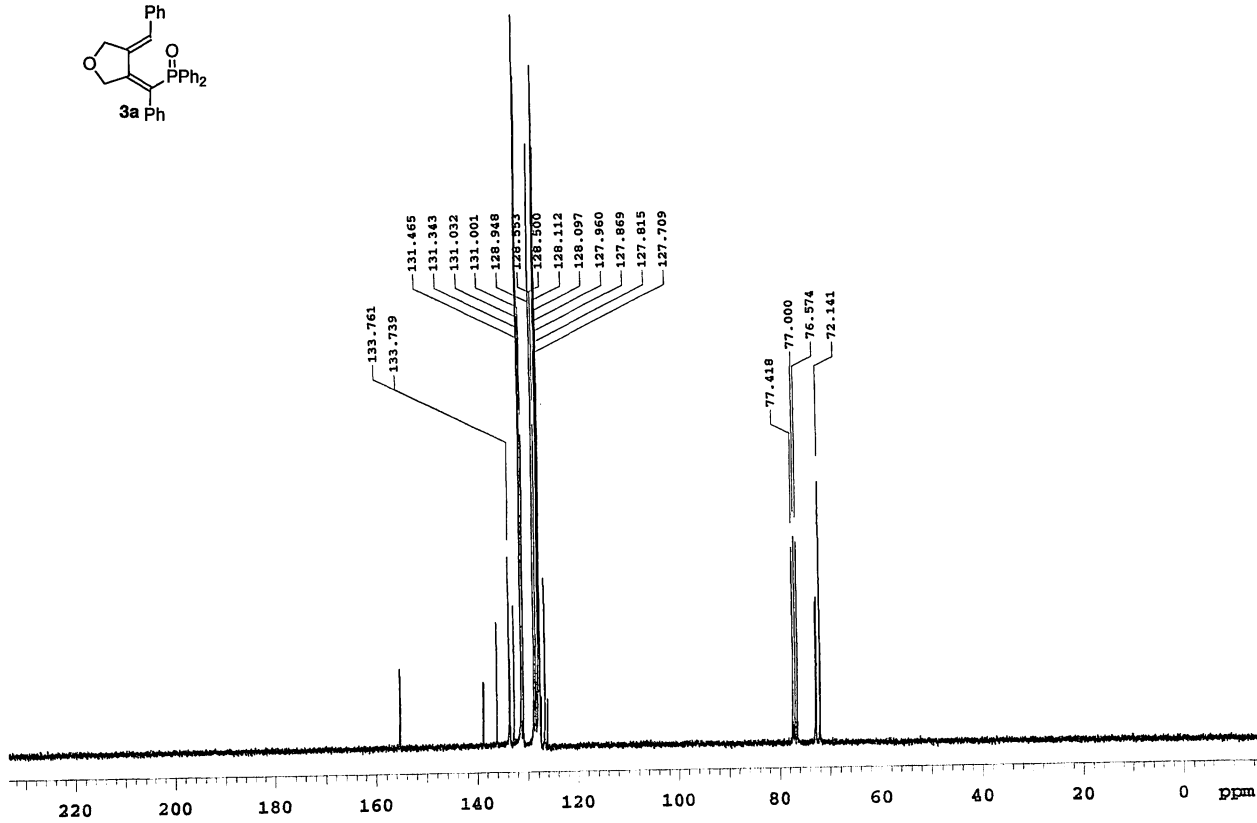

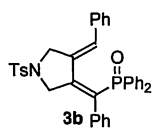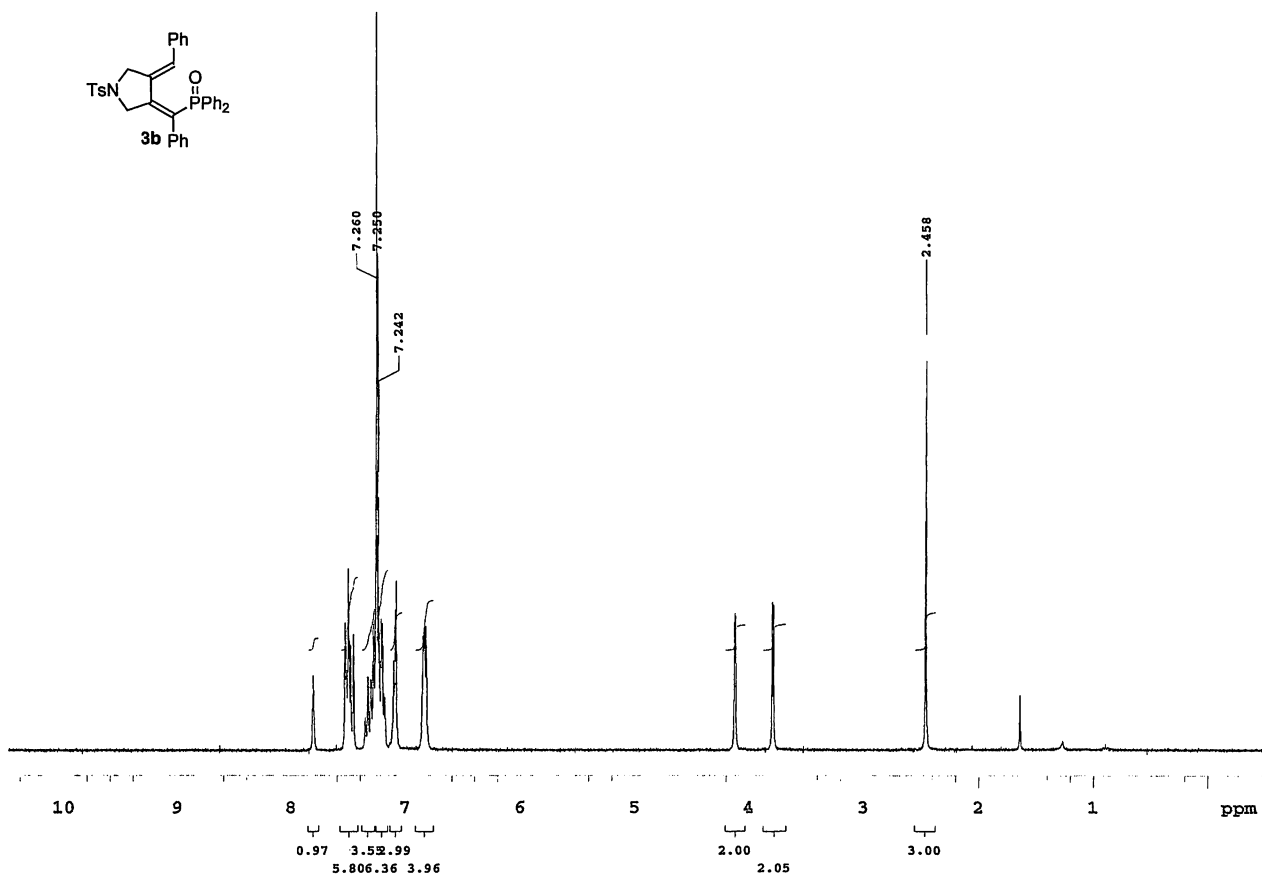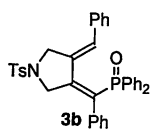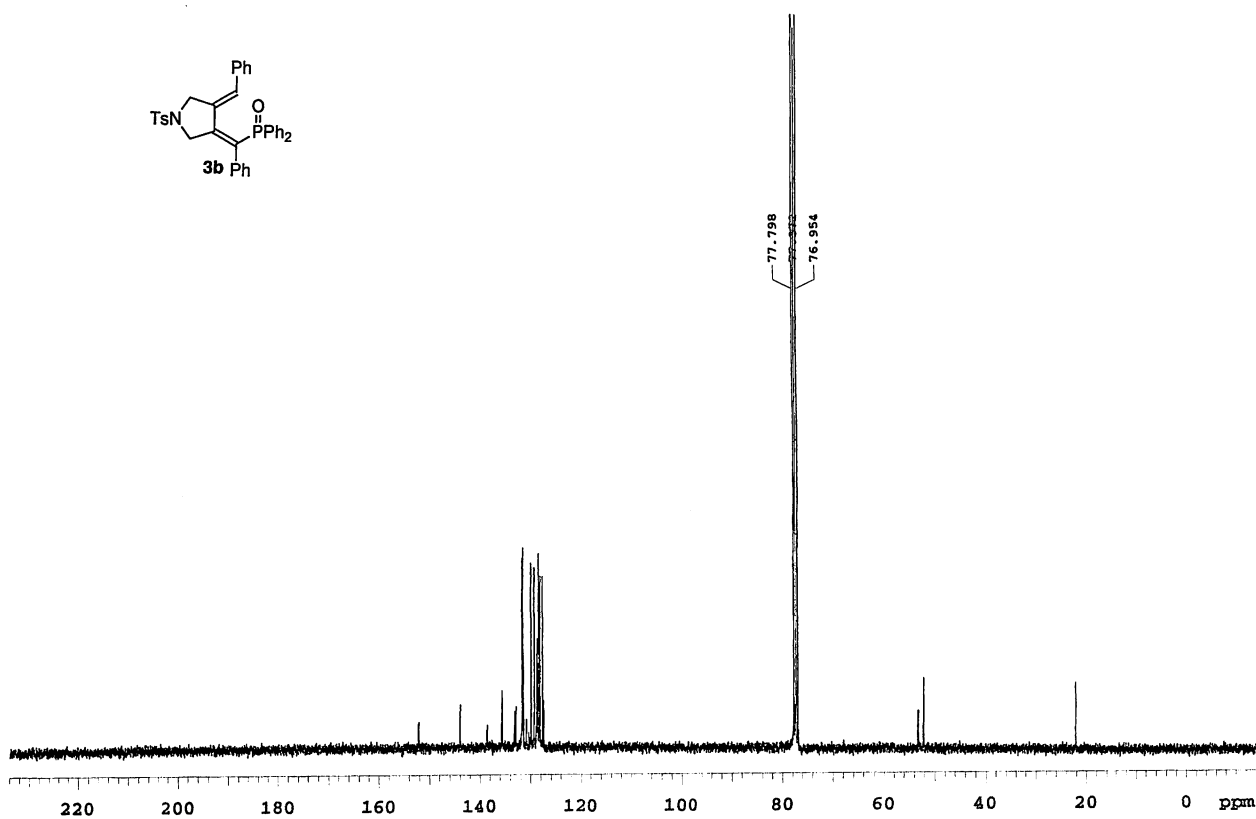

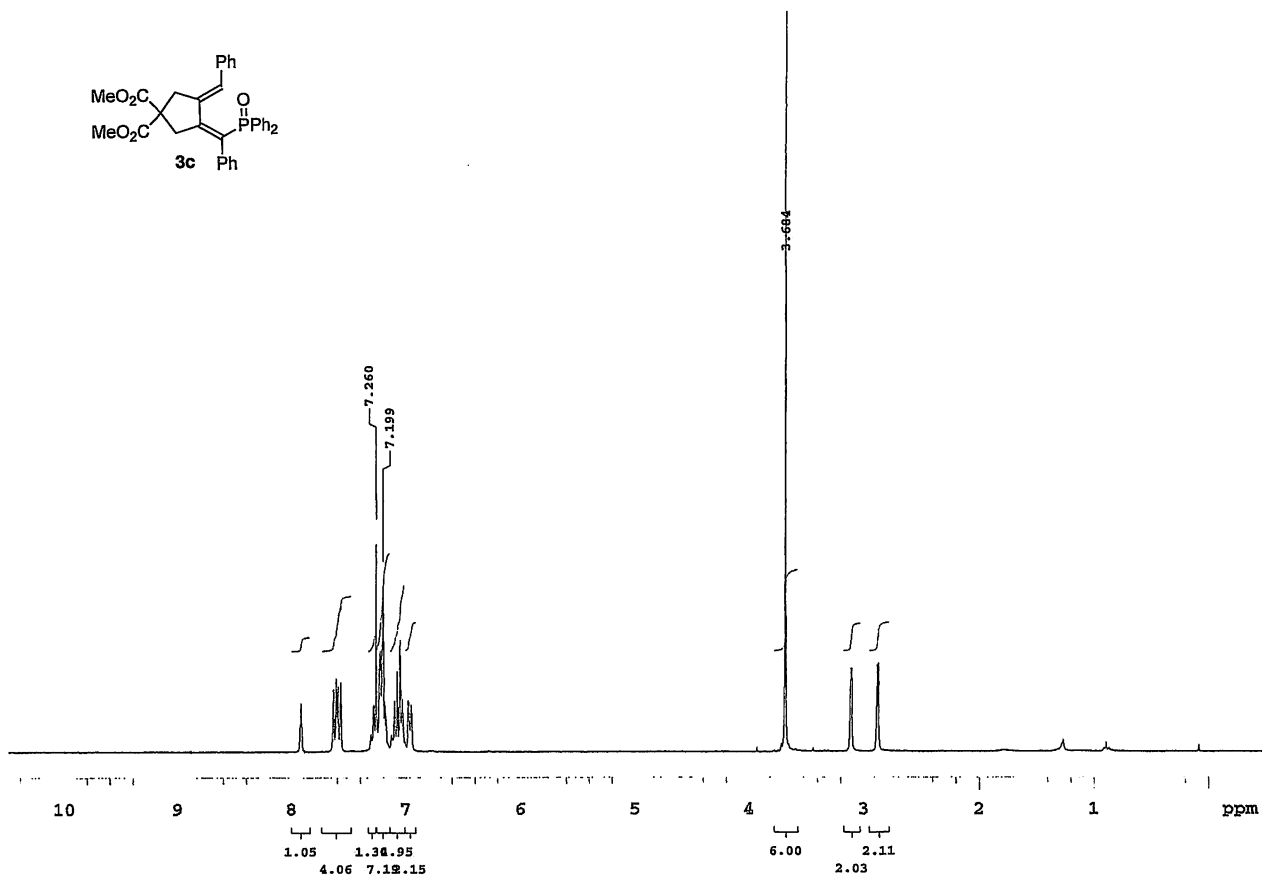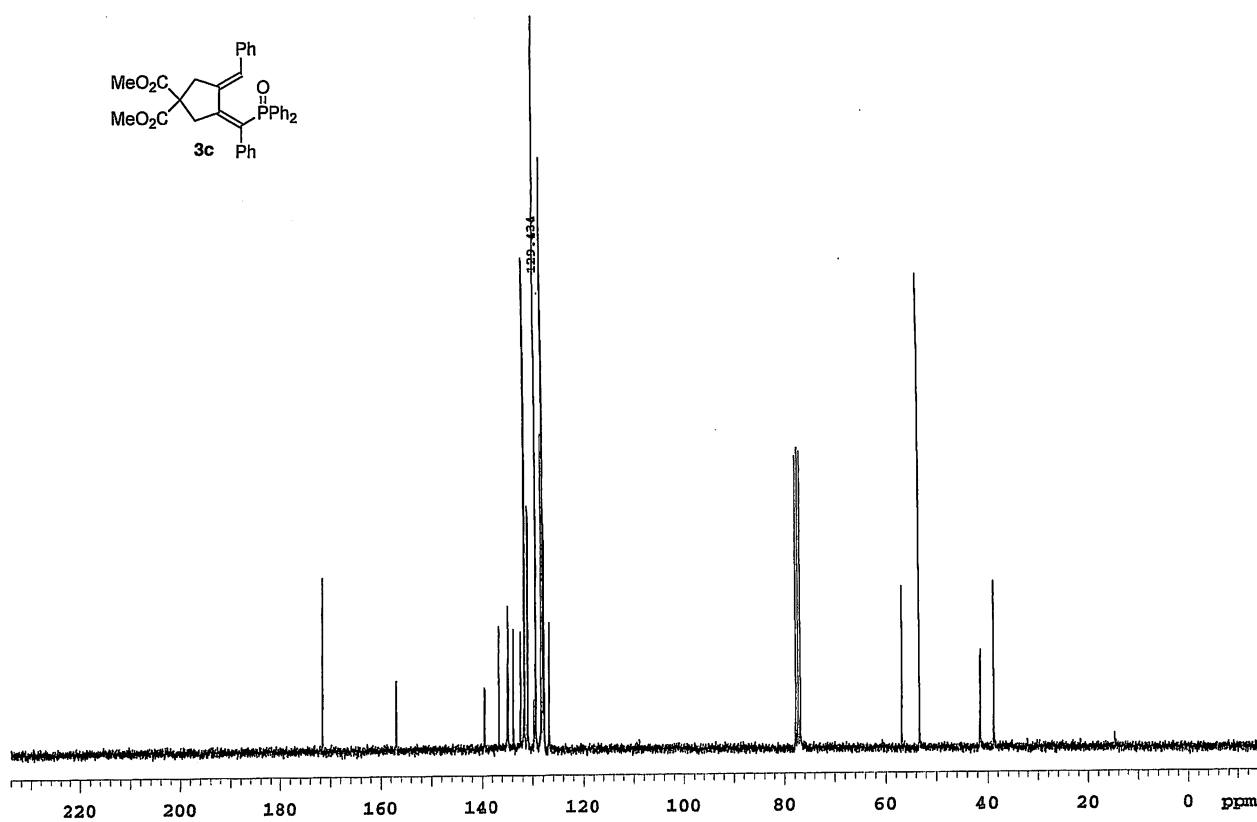

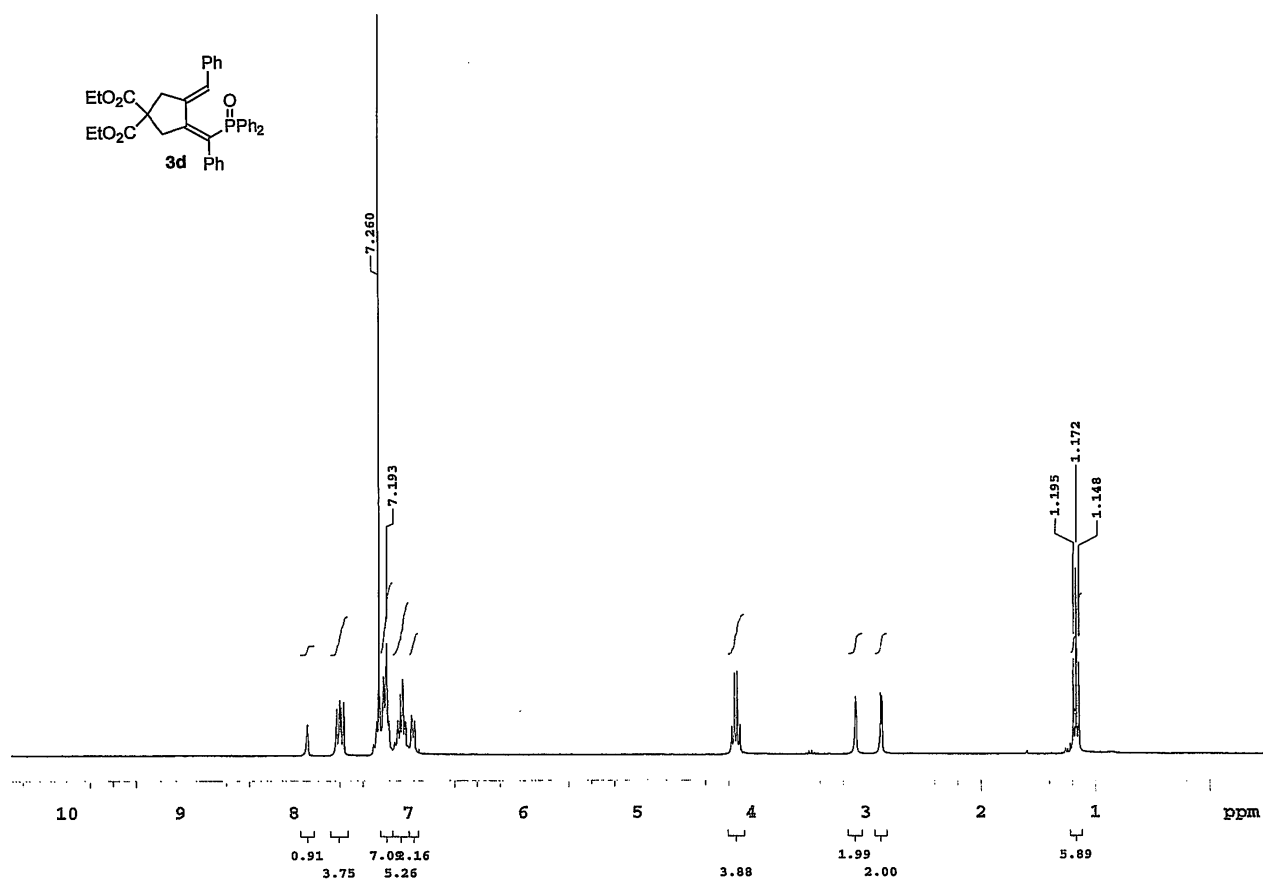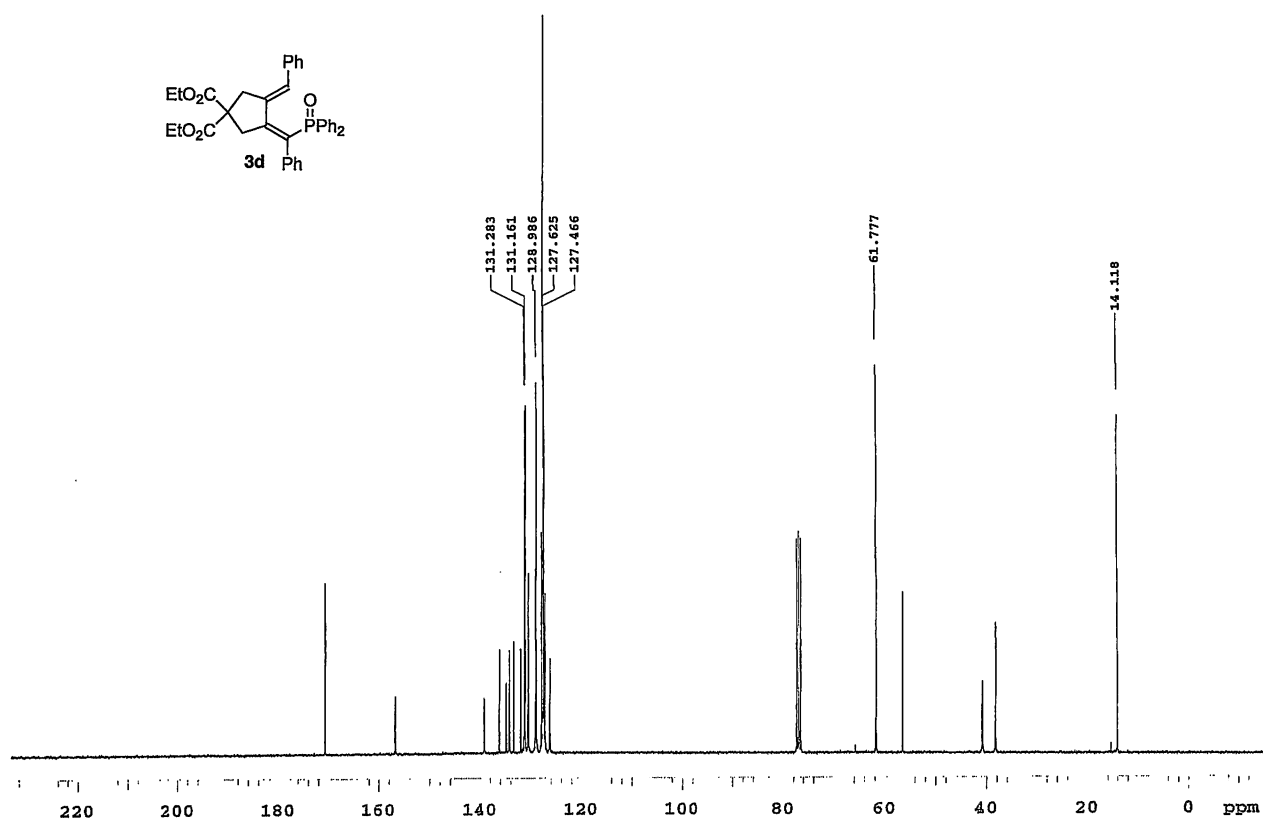

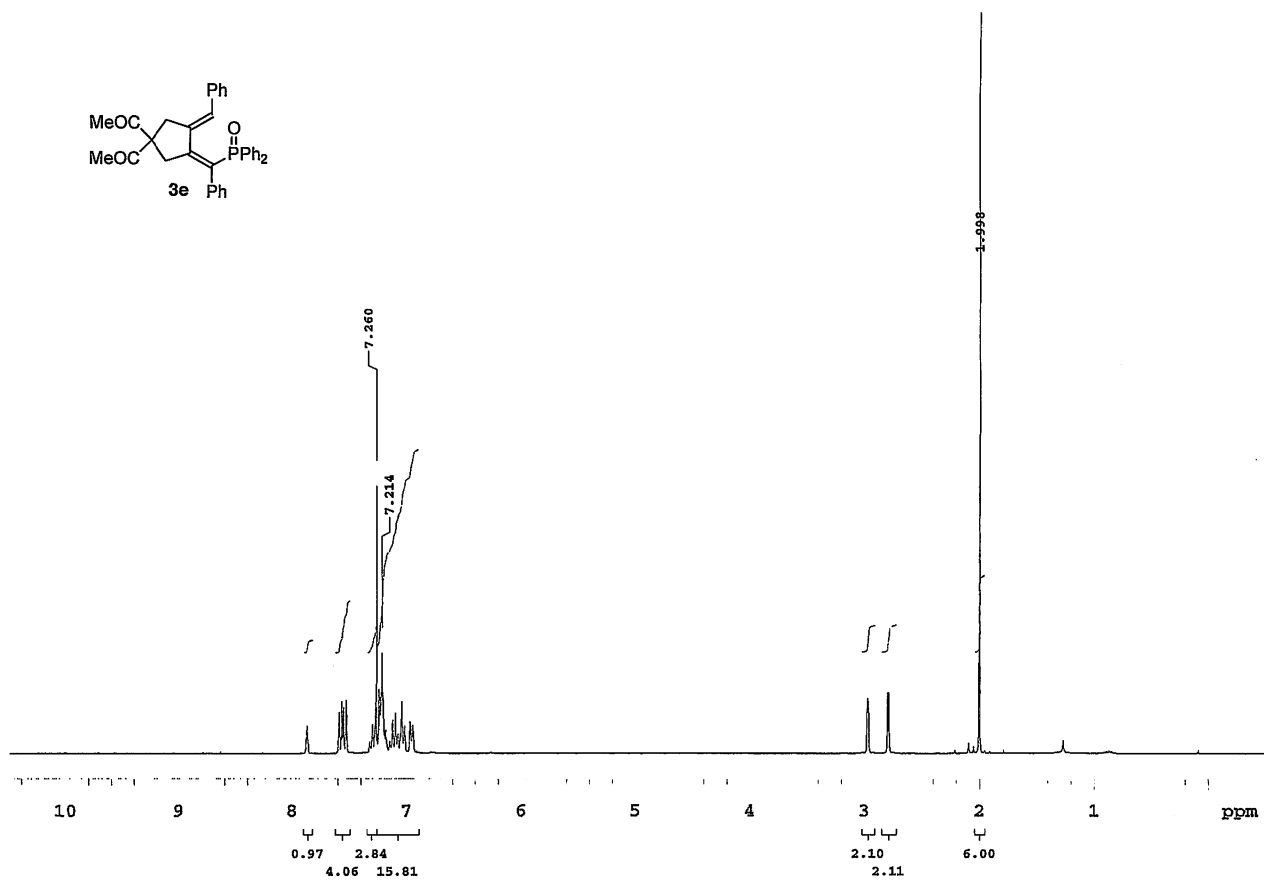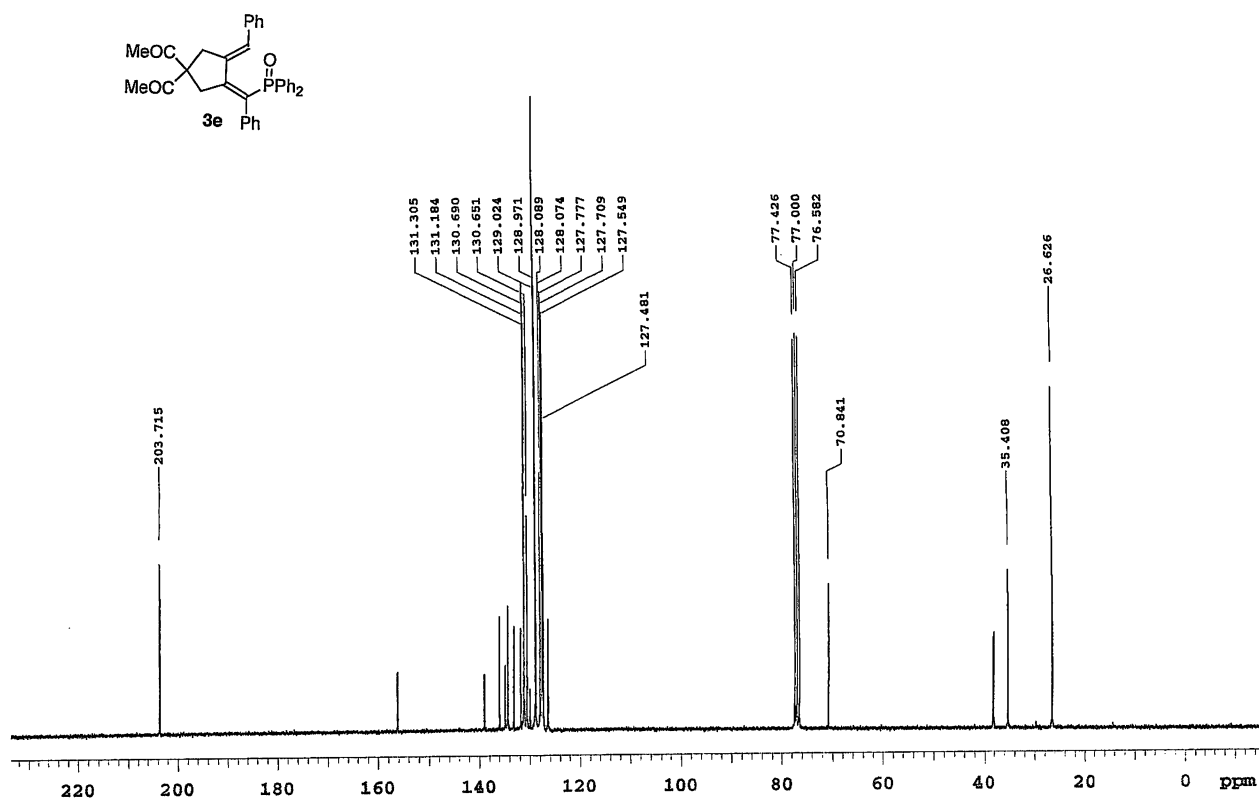



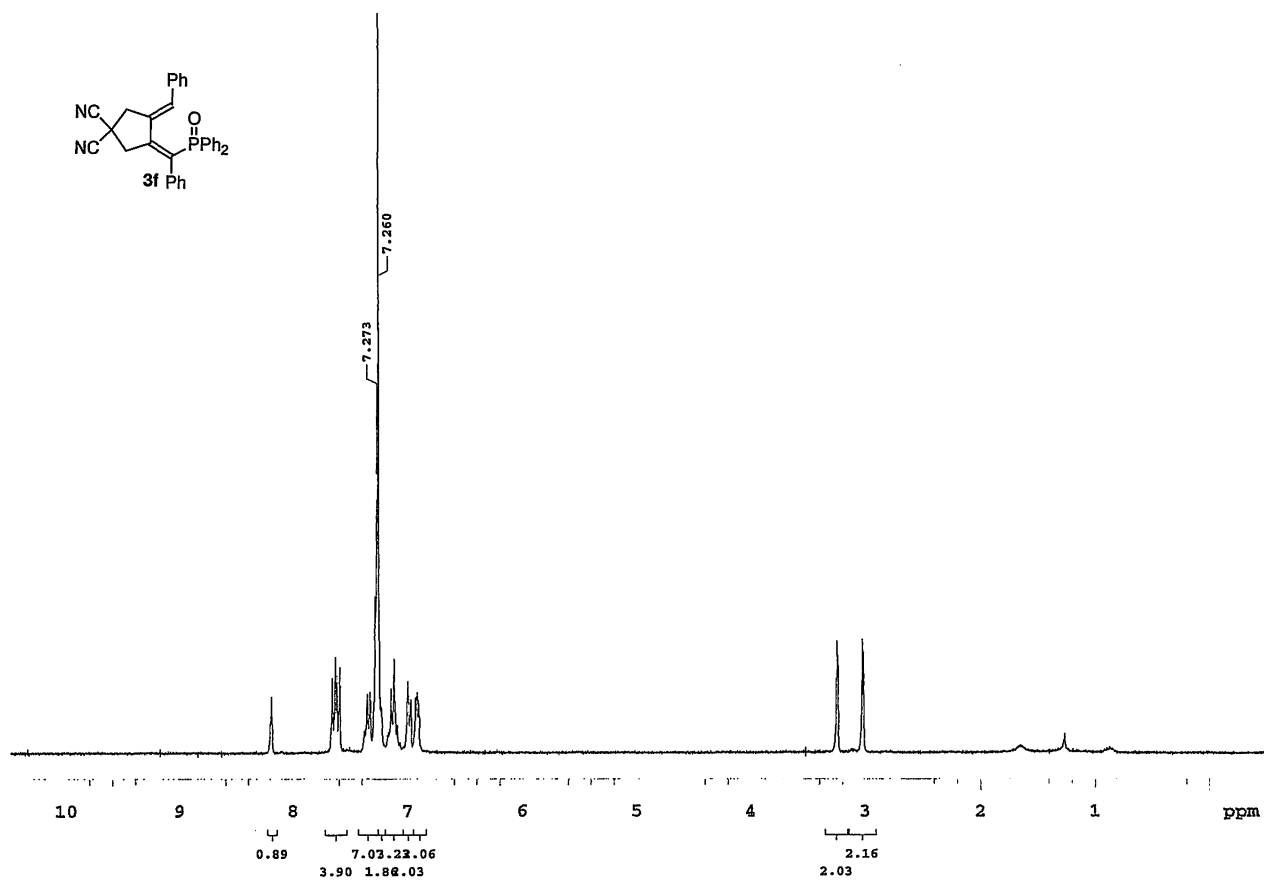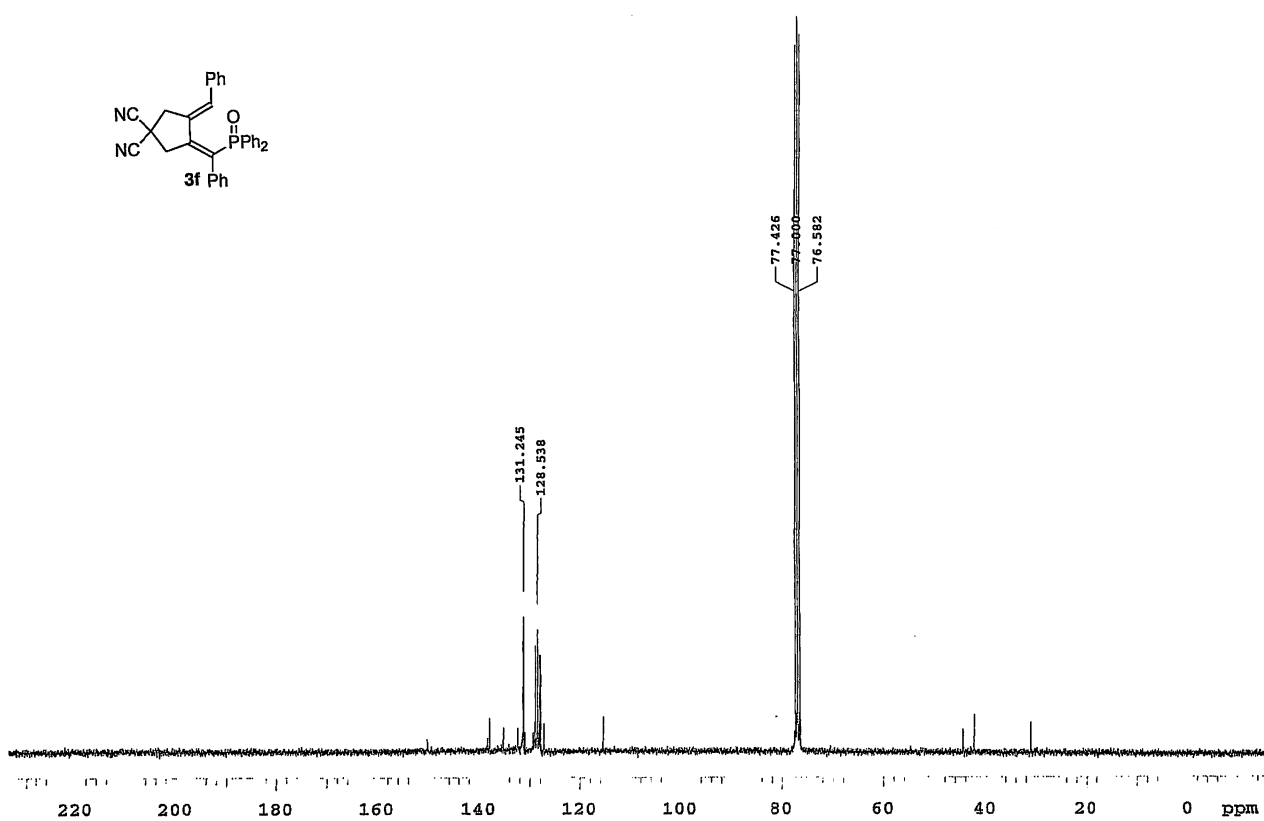

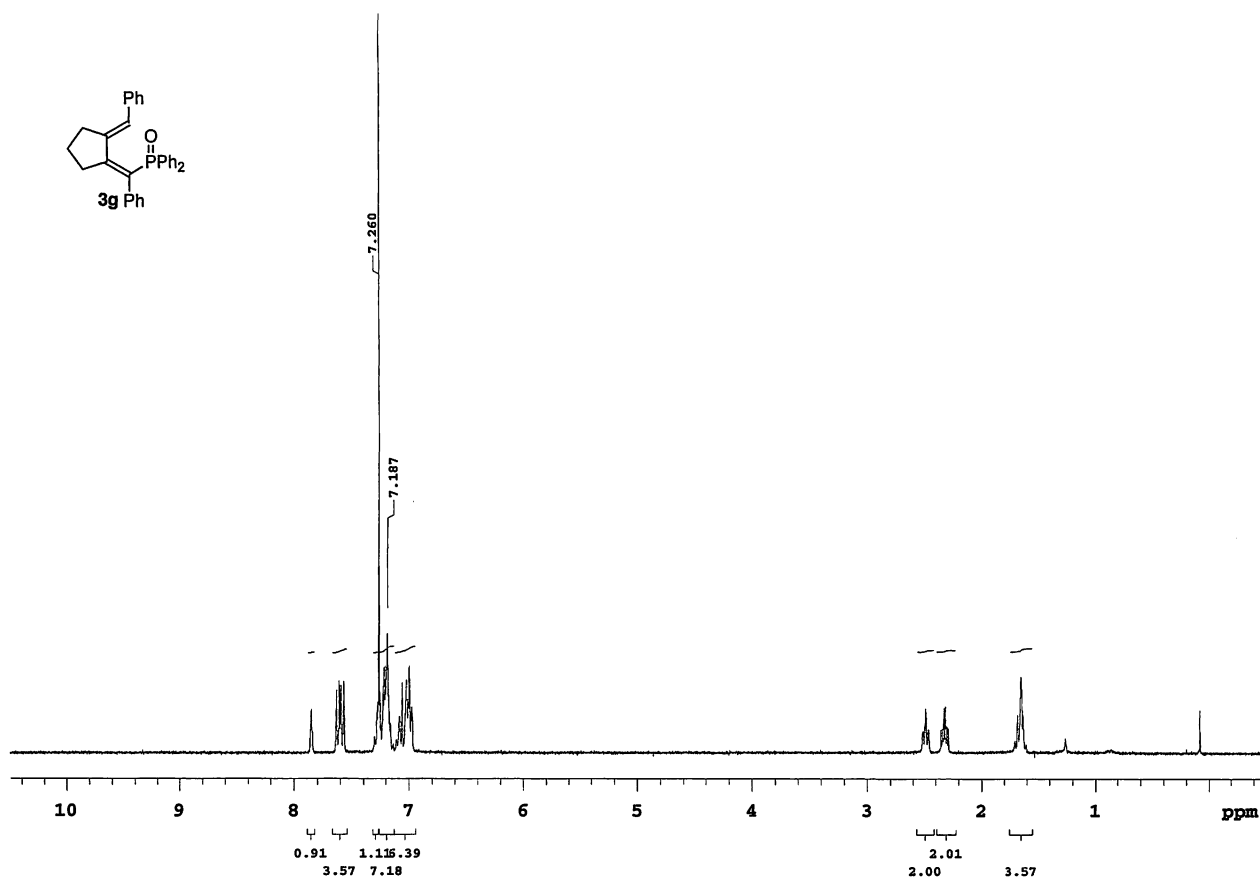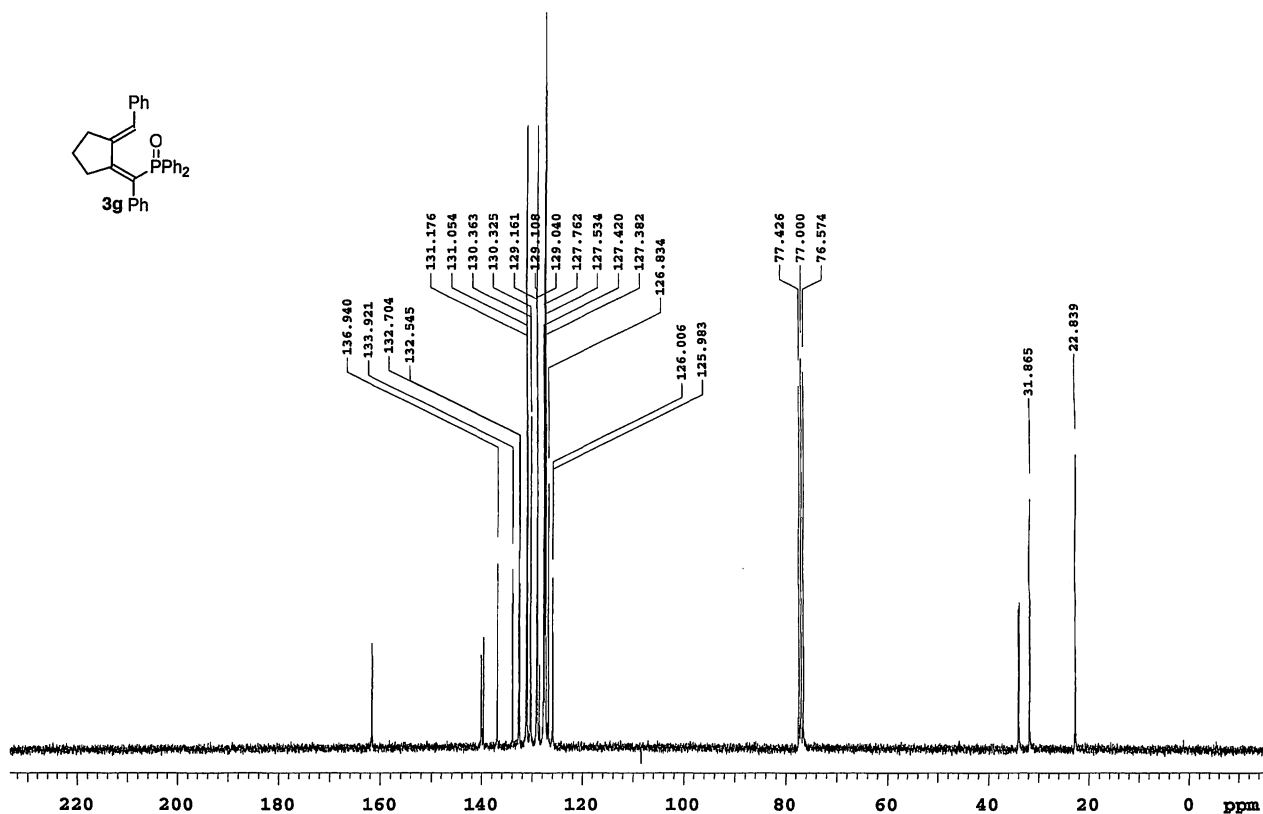

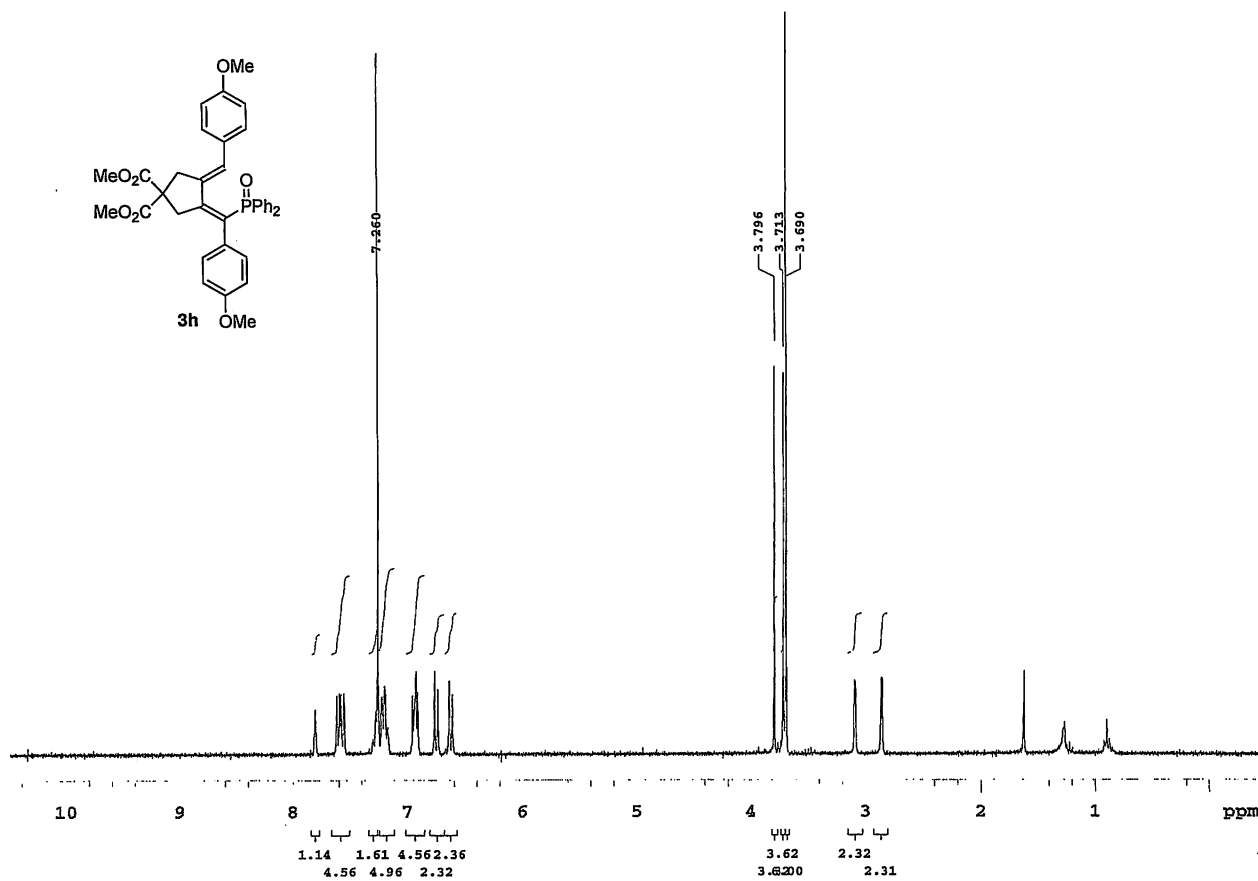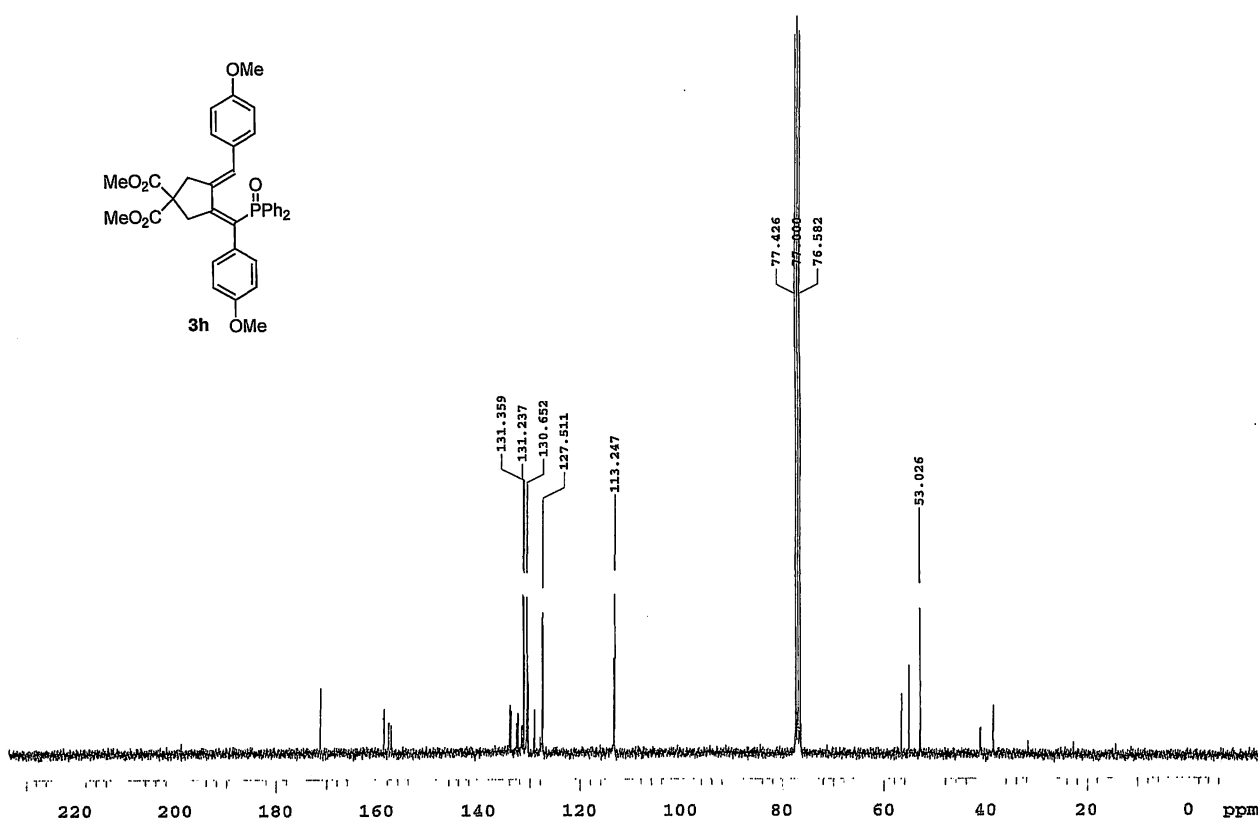

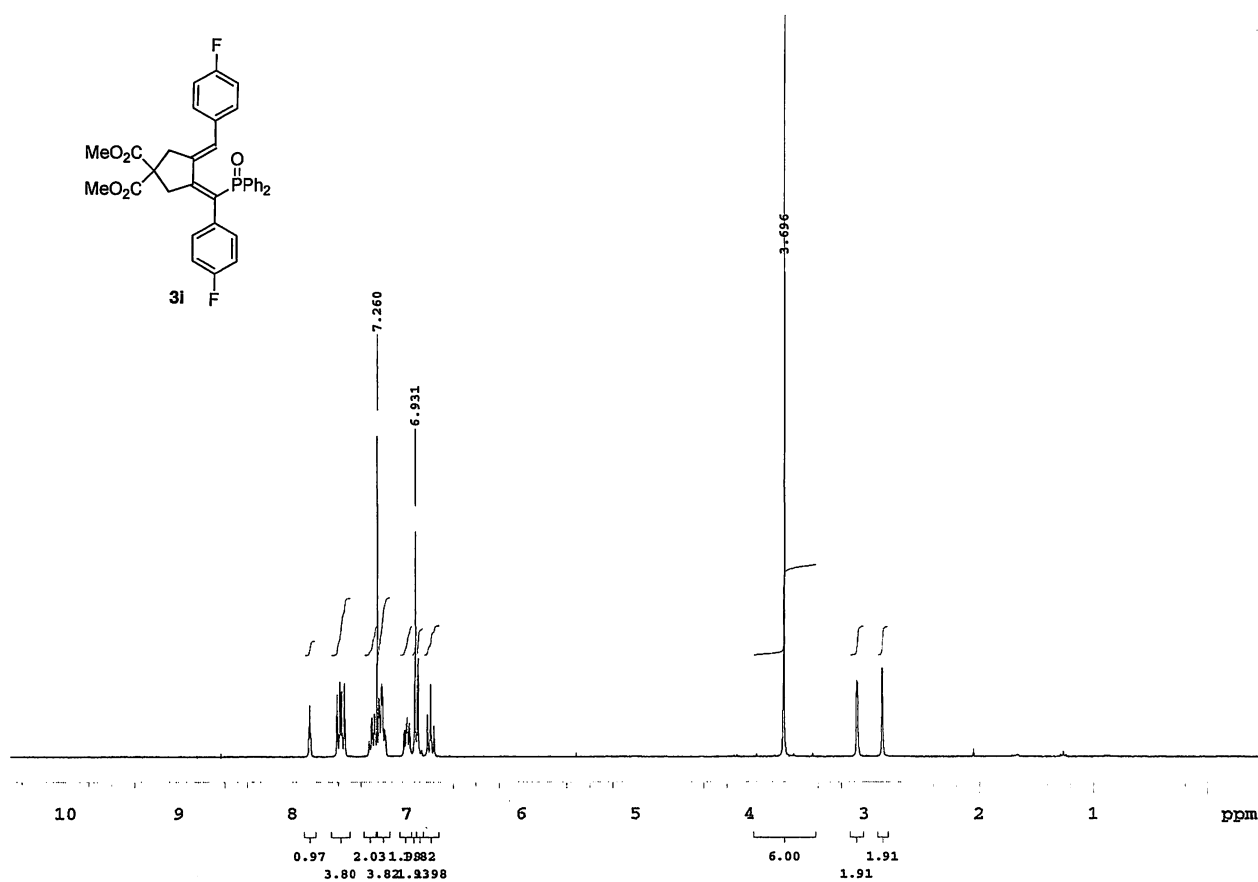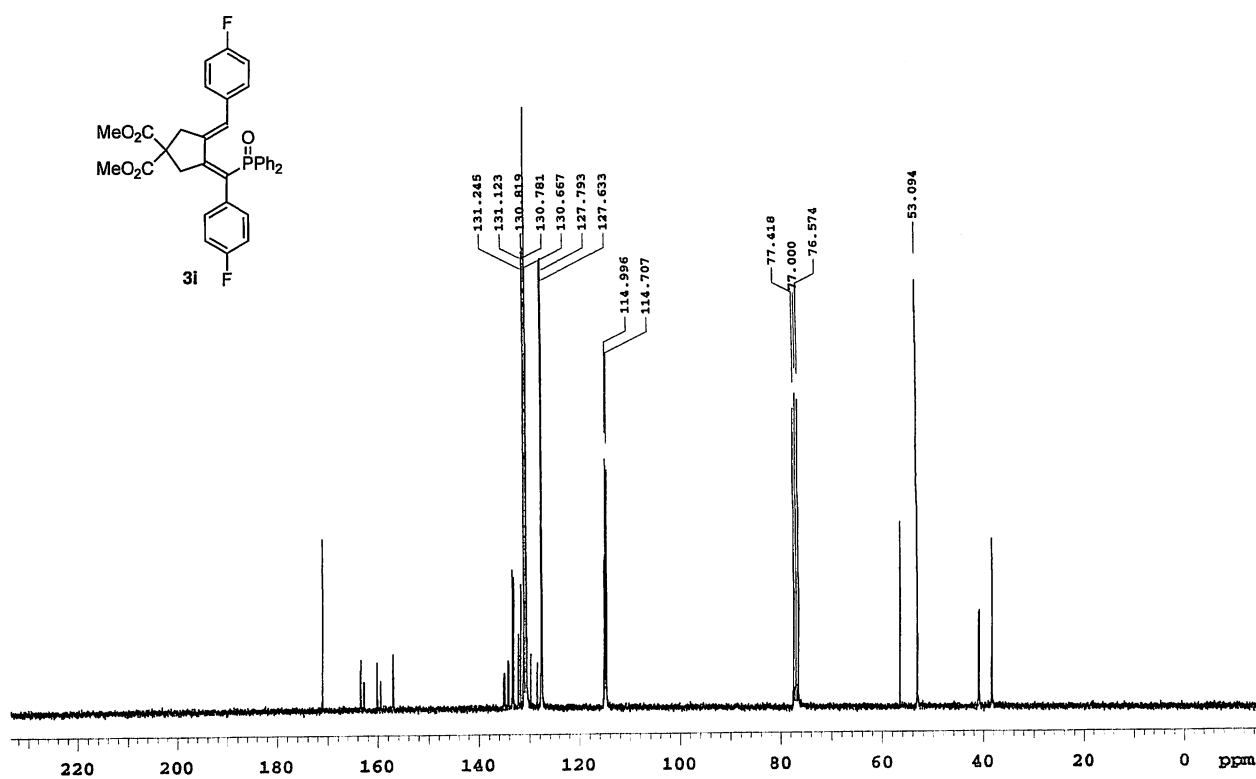

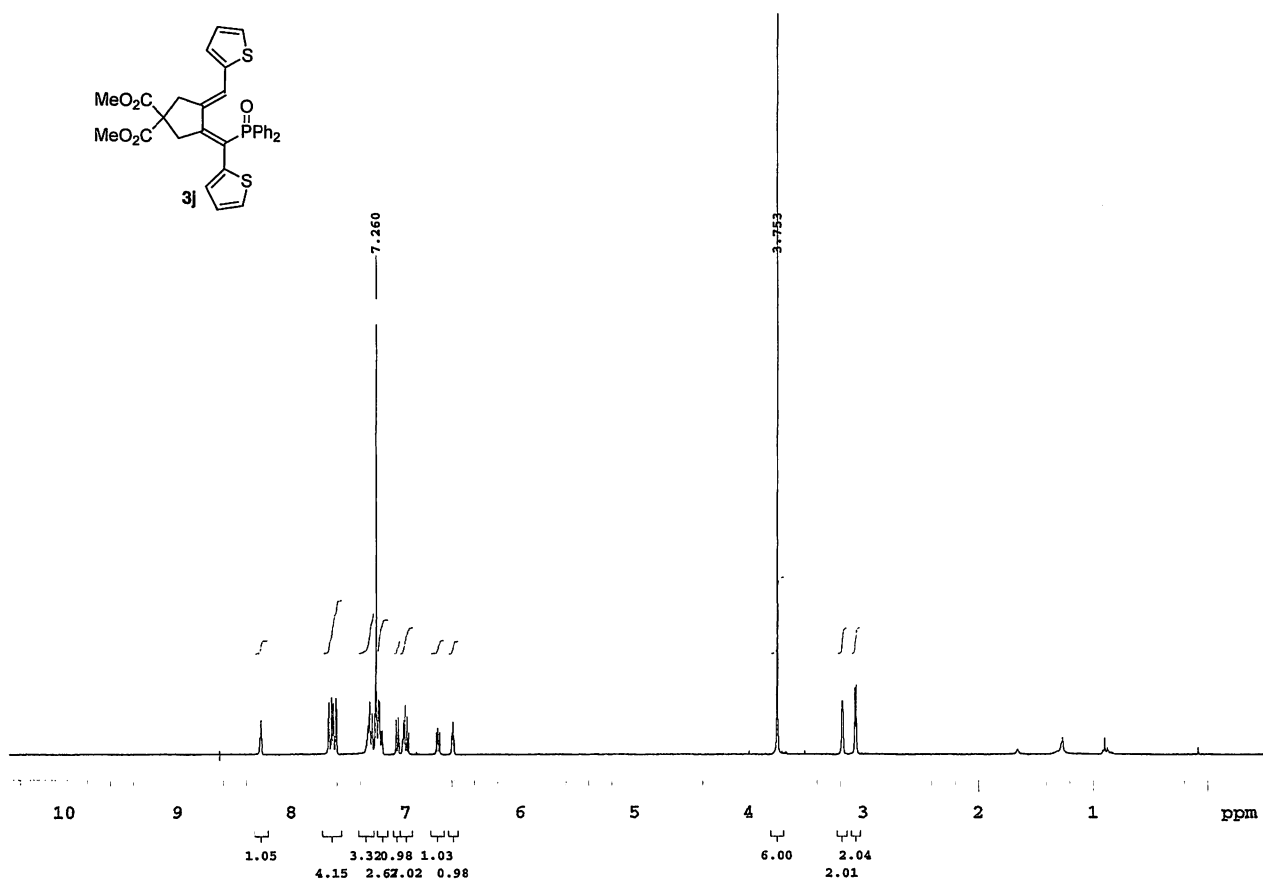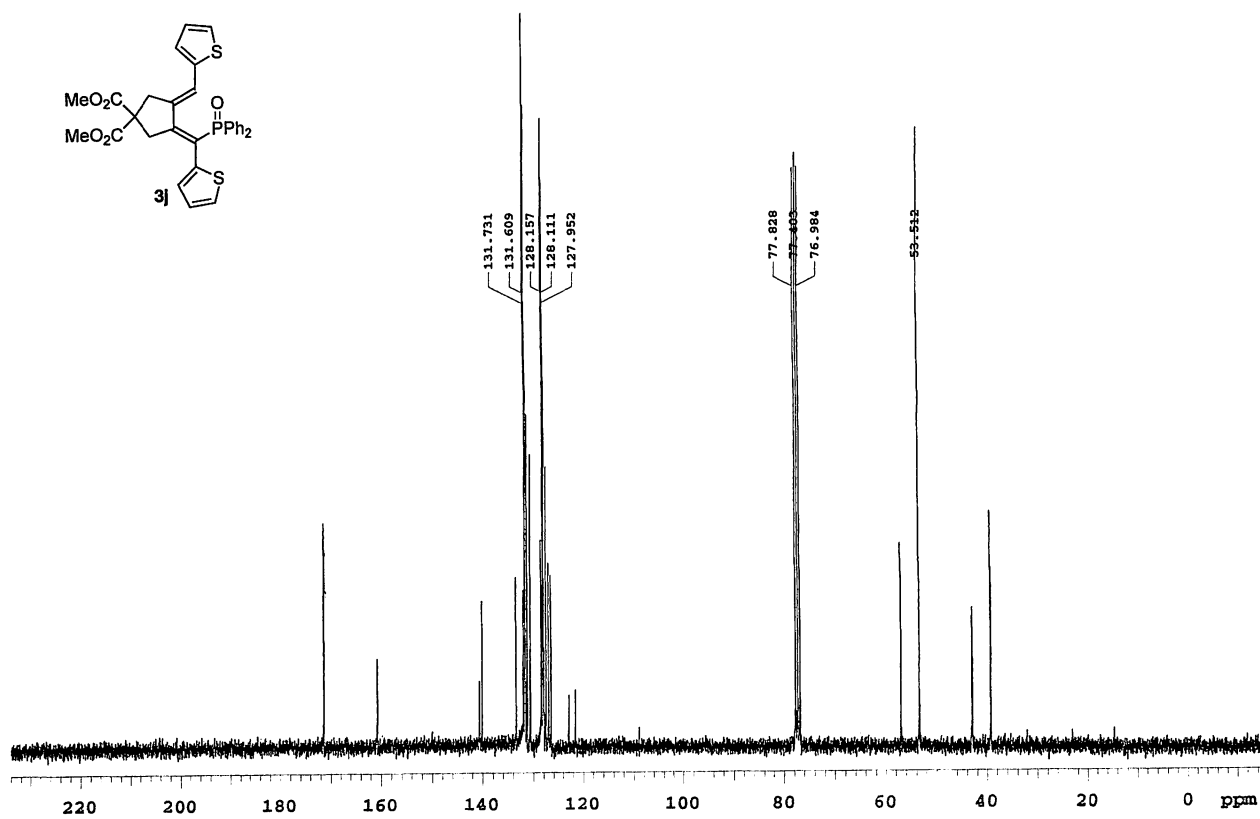

Supplement: c2cc34044e.pdf [file c2cc34044e.pdf]
